# 1 **Molecular basis of differential adventitious rooting competence in poplar genotypes**

2

3 Alok Ranjan<sup>1#</sup>, Irene Perrone<sup>1,2#</sup>, Sanaria Alallaq<sup>1,3#</sup>, Rajesh Singh<sup>4‡</sup>, Adeline Rigal<sup>5</sup>, Federica  
4 Brunoni<sup>1§</sup>, Walter Chitarra<sup>2,6</sup>, Frederic Guinet<sup>5</sup>, Annegret Kohler<sup>5</sup>, Francis Martin<sup>5</sup>, Nathaniel  
5 Street<sup>1</sup>, Rishikesh Bhalerao<sup>4</sup>, Valérie Legué<sup>5‡</sup>, and Catherine Bellini<sup>1,7,\*</sup>.

6

7 <sup>1</sup> Umeå Plant Science Centre, Department of Plant Physiology, Umeå University, SE-90736  
8 Umeå, Sweden

9 <sup>2</sup> Institute for Sustainable Plant Protection, National Research Council of Italy (IPSP-CNR), I-  
10 10135 Torino, Italy

11 <sup>3</sup> Department of Biology, College of Science for Women, Baghdad University, 10071, Baghdad,  
12 Iraq

13 <sup>4</sup> Umeå Plant Science Centre, Department of Forest Genetics and Physiology, Swedish  
14 Agriculture University, SE-90183 Umea, Sweden

15 <sup>5</sup> Université de Lorraine, INRAE, UMR Interactions Arbres/Microorganismes, Laboratory of  
16 Excellence ARBRE, INRAE GrandEst-Nancy, Champenoux, 54280 France

17 <sup>6</sup> Research Centre for Viticulture and Enology, Council for Agricultural Research and  
18 Economics (CREA-VE), I-31015 Conegliano (TV), Italy

19 <sup>7</sup> Institut Jean-Pierre Bourgin, INRAE, AgroParisTech, Université Paris-Saclay, FR-78000  
20 Versailles, France

21

22 Present addresses:

23 <sup>‡</sup> Department of Biotechnology, CSIR-Institute of Himalayan Bioresource Technology,  
24 Palampur, Himachal Pradesh 176061, India

25 <sup>§</sup> Laboratory of Growth Regulators, Faculty of Science, Palacký University & Institute of  
26 Experimental Botany, The Czech Academy of Sciences, Slechtitelu 27, CZ-78371,  
27 Olomouc, Czech Republic

28 <sup>‡</sup> Université Clermont Auvergne, INRAE, UMR 547 PIAF, F-63000 Clermont-Ferrand, France

29

30 # These authors have contributed equally to the work

31

32 \* Corresponding author

33 Pr Catherine Bellini            catherine.bellini@umu.se

34

35 **Abstract**

36

37 • Recalcitrant adventitious root (AR) development is a major hurdle in propagating  
38 commercially important woody plants. Although significant progress has been made to identify  
39 genes involved in subsequent steps of AR development, the molecular basis of differences in  
40 apparent recalcitrance to form AR between easy-to-root and difficult-to-root genotypes remains  
41 unknown.

42 • To address this, we generated cambium tissue-specific transcriptomic data from stem  
43 cuttings of hybrid aspen, T89 (difficult-to-root) and hybrid poplar OP42 (easy-to-root) and used  
44 transgenic approaches to verify the role of several transcription factors (TF) in the control of  
45 adventitious rooting.

46 • Increased peroxidase activity is positively correlated with better rooting. We found  
47 differentially expressed genes encoding Reactive Oxygen Species (ROS) scavenging proteins  
48 to be enriched in OP42 compared to T89. A higher number of differentially expressed TF in  
49 OP42 compared to T89 cambium cells was revealed by a more intense transcriptional  
50 reprogramming in the former. *PtMYC2*, a potential negative regulator, was less expressed in  
51 OP42 compared to T89. Using transgenic approaches, we have demonstrated that *PttARF17.1*  
52 and *PttMYC2.1* negatively regulate adventitious rooting.

53 • Our results provide insights into the molecular basis of genotypic differences in AR and  
54 implicate differential expression of the master regulator MYC2 as a critical player in this  
55 process.

56

57

58 **Key Words:** adventitious roots, cambium, hybrid aspen, hybrid poplar, *Populus* spp., stem  
59 cuttings

60

## 61 Introduction

62

63 In the 1990s, only 3% of the world's forested land was as plantations. However, despite this  
64 small percentage, it still provided more than one third of total industrial wood production  
65 (Kirilenko and Sedjo, 2007). The shift of production from natural forests to plantations is  
66 projected to accelerate and is expected to rise to 75% in the 2050s (Kirilenko and Sedjo, 2007).  
67 Operating plantations is expensive and requires high productivity per hectare, which in turn  
68 requires good quality, i.e., genetically improved planting stock. Many forest companies are  
69 therefore currently considering clonal propagation in addition to, or in conjunction with, their  
70 breeding programmes. This aims to propagate elite genotypes from available genetic diversity  
71 and maximise the productivity of selected high-value hybrid clones (Bozzano *et al.*, 2014). The  
72 genus *Populus* comprises about 30 species; its wood forms an abundant and renewable source  
73 of biomaterials and bioenergy (Ragauskas *et al.*, 2006). The propagation of poplar species  
74 depends primarily on AR formation from detached stem cuttings (Dickmann, 2006) but one  
75 major constraint for vegetative propagation of some economically important elite genotypes is  
76 incompetence or rapid loss of capacity in forming AR (Bellini *et al.*, 2014; Brunoni *et al.*, 2019;  
77 Bannoud and Bellini 2021). AR development is a complex, heritable trait controlled by many  
78 endogenous regulatory factors and much influenced by environmental factors (Bellini *et al.*,  
79 2014; Bannoud and Bellini 2021). The rooting capacity of cuttings varies among individuals  
80 within species, populations, or even clones (Abarca and Díaz-Sala, 2009a; Abarca and Díaz-  
81 Sala, 2009b). Few studies have reported the genetic variability of AR development of *Populus*  
82 hardwood cuttings. Zhang *et al.* (2009), reported quantitative trait loci (QTL) that control two  
83 AR growth parameters in a full-sib family of 93 hybrids derived from an interspecific cross  
84 between two *Populus* species, *P. deltoides* and *P. euramericana*, which are defined as difficult-  
85 to-root and easy-to-root, respectively. They showed that the maximum root length and the total  
86 number of AR were correlated and under strong genetic control, which supports earlier genetic  
87 QTL analysis performed on forest trees (reviewed in Geiss *et al.*, 2009). Several studies  
88 focusing on AR development in poplar have identified a number of genes involved in its  
89 regulation (Ramirez-Carvajal *et al.*, 2009; Rigal *et al.*, 2012; Trupiano *et al.*, 2013; Wuddineh  
90 *et al.*, 2015; Li *et al.*, 2018; Liu *et al.*, 2020; Wang *et al.*, 2020; Wei *et al.*, 2020; Xu *et al.*,  
91 2021; Xu *et al.*, 2015; Yordanov *et al.*, 2017; Yue *et al.*, 2020; Zhang *et al.*, 2020) including  
92 large-scale data analyses identifying regulators (Ribeiro *et al.*, 2016; Zhang *et al.*, 2019) and  
93 pharmacological assays of physiological regulators (Gou *et al.*, 2010; Mauriat *et al.*, 2014;  
94 Zhang *et al.*, 2019). All these studies resulted in a substantial increase in our understanding of

95 the molecular mechanisms that control successive steps of AR development, but the molecular  
96 basis of recalcitrance to form AR between easy-to-root and difficult-to-root genotypes remains  
97 unknown. To address this question, we compared the transcriptome of cambium cells obtained  
98 immediately after cutting and 24 h later by Laser Capture Microdissection (LCM) from *P.*  
99 *trichocarpa* × *P. maximowiczii* (clone OP42) which we defined as ‘easy-to-root from woody  
100 stem cuttings’, and the hybrid aspen *P. tremula* × *P. tremuloides* (clone T89) which we defined  
101 as ‘difficult-to-root from woody stem cuttings’. OP42 is one of the poplar clones used most  
102 widely, both in Northern Europe and worldwide (Taerøe *et al.*, 2015). It can easily be  
103 propagated from dormant stem cuttings. By contrast, the hybrid aspen T89 cannot be  
104 propagated *via* dormant stem cuttings but can be easily propagated *in vitro* and is very amenable  
105 to genetic transformation (Nilsson *et al.*, 1992). The analysis of the transcriptomic Dataset  
106 showed there to be more differentially expressed transcription factors (TF) in OP42 than in  
107 T89. We identified several TF that could explain differences in aptitude to produce adventitious  
108 roots. We show that the up-regulation of the jasmonate (JA) signalling pathway in the cambium  
109 of T89 could be one cause of the failure to produce adventitious roots.

110

111

## 112 **Materials and Methods**

113

### 114 **Plant growth conditions and rooting assays**

115 The hybrid aspen (*P. tremula* L. × *P. tremuloides* Michx), clone **T89**, and the hybrid poplar  
116 (*P. trichocarpa* × *P. maximowiczii*) clone **OP42**, were propagated *in vitro* for four weeks as  
117 described in Karlberg *et al.*, (2011) (Methods S1; Fig. S1a). For *in vitro* rooting assays, 3 cm  
118 cuttings of T89 and OP42 plantlets were collected and transferred to fresh sterile medium  
119 (Methods S1; **Fig. S1b, d**). The number of AR was scored from day five after cutting until day  
120 14. Three replicates of 15 stem cuttings each were analysed. For the jasmonic acid treatment,  
121 cuttings from four-week-old *in vitro* T89 and OP42 plantlets were transferred to fresh sterile  
122 medium with or without methyl jasmonate (MeJA) at 5 µM, 10 µM, or 20 µM.

123 For the rooting assay in hydroponic conditions, 20 cm long stem cuttings taken from the third  
124 internode below the shoot apex from three-month-old T89 and OP42 plants grown in the  
125 greenhouse, were transferred to hydroponic conditions (Methods S1; **Fig. S1c,e**).

126

### 127 **Histological analysis of stem cuttings *in vitro***

128 5 mm stem fragments were taken at the base of cuttings four or five days after cutting. Samples  
129 were fixed and prepared for sectioning as described in Methods S2. 10  $\mu\text{m}$  sections were  
130 obtained with a rotary microtome (<https://www.zeiss.com/>) and stained with safranin (Sigma-  
131 Aldrich, <https://www.sigmaaldrich.com/>) and alcian blue (Sigma-Aldrich,  
132 <https://www.sigmaaldrich.com/>) in a ratio of 1:2; using methods from Hamann *et al.*, (2011).

133

## 134 **Tissue preparation before LCM**

### 135 *Sampling, fixation and cryoprotection steps*

136 The basal 5 mm stem segments from T89 and OP42 cuttings were harvested immediately after  
137 excision from greenhouse grown plants (Time T0) and after 24 h of hydroponic culture (Time  
138 T1) (Fig. S2a-c). For each genotype, at each time point, three biological replicates were  
139 collected (12 stem segments in total = 3 biological replicates x 2 genotypes x 2 time points).  
140 Immediately after sampling, the stem pieces were split in half longitudinally, subjected to  
141 fixation and cryoprotection steps before the laser microdissection according to the protocol  
142 described at <https://schnablelab.plantgenomics.iastate.edu/resources/protocols/>, slightly  
143 modified as described in Methods S3.

144

### 145 *Cryosectioning*

146 Samples were fixed with Tissue-Tek® Optimal Cutting Temperature (O.C.T.) compound onto  
147 a specimen stage directly in the cryo chamber. Stem segments were mounted to allow  
148 cryosectioning, and cambium collection from tangential cryosections (Fig. S2d) in order to  
149 avoid embedding and the presence of O.C.T. compound on membrane slides. Sections of 25  
150  $\mu\text{m}$  were transferred onto membrane slides. Three progressive dehydration steps in ethanol  
151 were applied. After ethanol removal, sections were air-dried before microdissection (Methods  
152 S3).

153

## 154 **Laser capture microdissection, RNA extraction, and RNA Sequencing**

155 LCM was performed with a PALM Robot-Microbeam system (Zeiss MicroImaging, Munich,  
156 Germany). Cambium microdissected cells were catapulted into the adhesive caps of 500  $\mu\text{l}$   
157 tubes (Zeiss) (Fig. S2e-k). Total RNA was isolated using the PicoPure RNA Isolation Kit  
158 (Thermo Fisher Scientific, <https://www.fishersci.se/se/en/home.html>). Quality and quantity of  
159 RNA samples were assessed using the Bio-Rad Experion analyser and Experion RNA high-  
160 sense analysis kit (Bio-Rad). Total RNA from each biological replicate was amplified using the  
161 MessageAmp II aRNA amplification kit (Ambion, Austin, TX, U.S.A.). Amplified RNA

162 profiles were verified using the Experion analyser and Experion RNA standard-sense analysis  
163 kit (Bio-Rad). In total, twelve cDNA paired-end libraries were generated using the mRNA-Seq  
164 assay for transcriptome sequencing on an Illumina HiSeq™ 2000 platform at Beijing Genome  
165 Institute (BGI, China), but only eleven were sequenced as one T89 (T1) sample failed the  
166 quality check.

167

### 168 **Pre-processing of RNA-Seq data**

169 The data pre-processing was performed as described in:  
170 <http://www.epigenesys.eu/en/protocols/bio-informatics/1283-guidelines-for-rna-seq-data> and  
171 detailed in Methods S4.

172

### 173 **Differential gene expression analysis**

174 Statistical analysis of single-gene differential expression between conditions was performed in  
175 R (v3.4.0; Team, 2018) using the Bioconductor (v3.5; Gentleman *et al.*, 2004) DESeq2 package  
176 (v1.16.1; Love *et al.*, 2014). FDR adjusted p-values were used to assess significance; a common  
177 threshold of 1% was used throughout. For the data quality assessment and visualisation, the  
178 read counts were normalised using a variance stabilising transformation (vst) as implemented  
179 in DESeq2. The biological relevance of the data, such as similarity of biological replicates (Fig.  
180 S3a,b) and other visualisations (e.g., heat maps), were obtained using custom R scripts,  
181 available at [https://github.com/nicolasDelhomme/poplar\\_cambium](https://github.com/nicolasDelhomme/poplar_cambium).

182 Dendrograms and heat maps were generated using the function heatmap.2 from the gplots R  
183 library. Heat maps of differentially expressed genes (DEG) (DE cut-offs of  $FDR \leq 0.01$  and  
184  $|LFC| \geq 0.5$ ), were generated using the function heatmap.2 from the gplots R library. The 17,997  
185 genes, which were detected in all biological replicates, were used for further analysis. Genes  
186 which were expressed only in one or two biological replicates for each genotype, but which  
187 were significantly differently expressed between T89 and OP42, were analysed separately. The  
188 gene expression mean values are listed in Dataset S3 (sheet 6).

189

### 190 **Gene ontology analysis**

191 The REVIGO web server (<http://revigo.irb.hr/>) was used to summarise GO terms from  
192 differentially expressed genes (Supek *et al.*, 2011). The GO terms with a false discovery rate  
193 (FDR; e-value corrected for list size) of  $\leq 0.05$  were submitted to the REVIGO tool, and the  
194 ‘small allowed similarity’ setting was selected to obtain a compact output of enriched GO terms.  
195 The overall significance of enriched processes was expressed as the sum of  $100 \times -\log_{10}(FDR)$

196 for each enriched GO term counted within that process. This technique was adapted from the  
197 method used to visualise enriched GO terms as a percentage of the total enriched terms in the  
198 TreeMap function of the REVIGO web server.

199

## 200 **Transcription factors and digital differential gene expression analysis**

201 The gene list of *P. trichocarpa* transcription factors was downloaded from the plant  
202 transcription factor database v4.0 (<http://planttfdb.gao-lab.org/>).

203

## 204 **Identification of poplar homologues of Arabidopsis ARFs and MYC transcription factors**

205 Full-length amino acid sequences of the selected poplar and Arabidopsis *AUXIN RESPONSE*  
206 *FACTOR (ARF)* genes were subjected to phylogenetic analysis as described in Methods S5.

207 The most closely related orthologues were chosen for the study (Fig. S4a). We used poplar *ARF*  
208 gene names according to the nomenclature in PopGenIE. Corresponding gene names are as

209 follows: *PtrARF6.1*; Potri.005G207700, *PtrARF6.2*; Potri.002G055000, *PtrARF6.3*;

210 Potri.001G358500, *PtrARF6.4*; Potri.011G091900, *PtrARF8.1*; Potri.004G078200,

211 *PtrARF8.2*; Potri.017G141000, *PtrARF17.1*; Potri.005G171300 and *PtrARF17.2*;

212 Potri.002G089900. Similarly, the poplar homologues of Arabidopsis *AtMYC2.1* were analysed;

213 their corresponding gene names are as follows: *PtrMYC2.1*; Potri.003G092200, *PtrMYC2.2*;

214 Potri.001G142200, *PtrMYC2.3*; Potri.002G176900, *PtrMYC2.4*; Potri.001G083500,

215 *PtrMYC2.5*; Potri.003G147300 and *PtrMYC2.6*; Potri.014G103700.

216

## 217 **Generation of transgenic hybrid aspen plants**

218 To amplify the candidate genes, cDNA was synthesised starting from total RNA extracted from

219 hybrid aspen T89 (*P. tremula* x *P. tremuloides*) leaves and DNase treated. As it is not possible

220 to distinguish the sequence of *P. tremula* from that of *P. tremuloides*, the genes are referred to

221 as *PttARF6.4*, *PttARF8.2*, *PttARF17.2* and *PttMYC2.1* and the corresponding primers used for

222 amplification of the coding sequence are listed in Table S1.

223 Transgenic T89 plants over-expressing *PttARF6.4*, *PttARF8.2* or *PttMYC2.1* or down-regulated

224 for the expression of *PttARF6.4*, *PttARF8.2* and *PttARF17.2* were produced as described in the

225 Methods S5. The relative expression levels of *PttARF6.1/2*, *PttARF6.3/4*, *PttARF8.1/2*,

226 *PttARF17.1/2* and *PttMYC2.1* in the respective transgenic lines were further quantified by

227 qPCR.

228

## 229 **Quantitative Real-Time PCR analysis**

230 To check the over-expression or the down-regulation of the selected genes in the transgenic  
231 lines, five 5 mm stem pieces were taken at the base of cuttings from T89 (3 biological replicates)  
232 and transgenic lines (3 biological replicates for each line) at the time of adventitious rooting  
233 assay, and pooled. Each biological replicate was formed by a pool of stem pieces collected from  
234 three different plants. Total RNA extraction and quantitative real-time PCR analyses were  
235 performed as previously described (Gutierrez *et al.*, 2008) and are detailed in Methods S6.  
236 *PtUBIQUITINE* (Potri.001G418500), which had been previously validated for gene expression  
237 analysis in T89 stem cuttings with geNORM (Gutierrez *et al.*, 2008) was used as the reference  
238 gene. Due to the high sequence similarity we failed to design paralogue-specific qPCR primers  
239 and instead designed primers that specifically amplify *PttARF6.1* and *PttARF6.2* paralogues  
240 together (*PttARF6.1/2*), *PttARF6.3* and *PttARF6.4* paralogues together (*PttARF6.3/4*).  
241 Similarly, primers were designed for *PttARF8.1* and *PttARF8.2* (*PttARF8.1/2*) and *PttARF17.1*  
242 and *PttARF17.2* (*PttARF17.1/2*) paralogue genes. Primers were designed to span the  
243 microRNA cleaving site for each gene to quantify the un-cleaved transcripts only (Table S1).  
244  
245



## 246 **Results**

247

### 248 **Hybrid aspen and hybrid poplar show different patterns of adventitious root formation**

249 To understand why some genotypes readily develop AR and others do not, we compared the  
250 rooting efficiency of cuttings from the poplar clone OP42 (*P. trichocarpa* × *P. maximowiczii*)  
251 and the hybrid aspen clone T89 (*P. tremula* × *P. tremuloides*) from juvenile plants kept *in vitro*  
252 (Fig. 1 and Fig. S1a,b,d) and from stem cuttings of three-month-old plants grown in the  
253 greenhouse (Fig. 2 and Fig. S1c,e). When cuttings were taken from juvenile *in vitro* plants, no  
254 significant difference between the two clones was observed (Fig. 1a). Nevertheless, in T89 *in*  
255 *vitro* cuttings, AR developed at the base of the cuttings in a crown-like arrangement (Fig. 1b-  
256 e), while in OP42, AR developed a few mm above the base of the cuttings and along the stem  
257 (Fig. 1 f-i,o,q). Cross- and longitudinal sections showed that in both cases the AR primordia  
258 initiated from the cambium region (Fig. 1j-q) as shown previously in cuttings of the *P.*  
259 *trichocarpa* clone 101-74 (Rigal *et al.*, 2012). In contrast, when cuttings were taken from  
260 greenhouse-grown three-month-old plants (Fig. S1c) and kept in a hydroponic culture system  
261 as described elsewhere (Merret *et al.*, 2010; Rigal *et al.*, 2012) (Fig. S1e), T89 cuttings were  
262 unable to develop AR (Fig. 2a,b) while 100% of OP42 cuttings did root (Fig. 2a,c). For OP42  
263 cuttings, the first bulges were visible on the stems as early as three days after cutting, and AR  
264 emerged after around five or six days (Fig. 2c) and fully developed and formed secondary roots  
265 were evident at 13 days after cutting (Fig. 2c). In both T89 and OP42 we observed the formation  
266 of lenticels; these correspond to cell proliferation regions in the cortex due to the high humidity  
267 in hydroponic conditions (Fig. 2b-e).

268

### 269 **Transcriptomic profile and functional classification of Differentially Expressed Genes** 270 **from cambium tissue between OP42 and T89 poplar genotypes**

271 To explain this extreme difference in rooting performance, we performed a transcriptomic  
272 analysis of the cambium of OP42 and T89 cuttings from three-month-old plants grown in the  
273 greenhouse (Fig. S2a). We performed LCM (Fig. S2d-i) to dissect and collect homogenous and  
274 specific cambium tissue from the basal 5 mm of stem cuttings at time T0 (immediately after  
275 cutting) (Fig. S2b) and T1 (24 h after transfer in hydroponic conditions) (Fig. S2c). We mapped  
276 the RNA-seq reads to the *P. trichocarpa* reference genome (Dataset S1, sheet1) and classified  
277 17,997 genes in the current annotation as being expressed significantly in all biological  
278 replicates in both genotypes at time T0 and T1 (Dataset S1, sheet 2). These 17,997 genes  
279 represent approximately 43% of the annotated genes in the *Populus* genome (poplar v3

280 assembly version; Tuskan *et al.*, 2006). Interestingly, there were more DEGs in OP42 after 24  
281 h in hydroponic conditions than in T89 (Fig. 3). In the case of T89, a total of 1198 (6.6% of the  
282 17,997) genes were differentially expressed, 824 were up-regulated and 374 were down-  
283 regulated at T1 compared to T0 (Fig. 3a, Dataset S2, sheets 11 to 13). Gene Ontology (GO)  
284 enrichment analysis of DEGs showed a significant enrichment of GO terms related to biological  
285 processes, and molecular functions related to carbohydrate catabolism or redox mechanisms,  
286 regulation of transcription, response to abiotic stresses, cation binding, nucleic acid binding  
287 activity, or electron carrier activity (Dataset S3, sheets 4 and 5). In contrast, in OP42, a total of  
288 5464 genes (30% of the 17,997 genes) were found differentially expressed, among which 3242  
289 were up-regulated and 2222 down-regulated at time T1 compared to T0 (Fig. 3a,c. Dataset S2,  
290 sheets 8 to 10). Interestingly, among the 3242 DEGs, 2420 (74.6%) were exclusively up-  
291 regulated in OP42 at T1 (Fig. 3b), suggesting a specific remodulation of the transcriptome in  
292 OP42 during the 24 h timeframe that did not occur in T89. The GO enrichment analysis of these  
293 upregulated DEGs showed a significant enrichment of GO in cellular components, biological  
294 processes or molecular functions related to cell metabolism or cell biology such as transcription  
295 regulation, translation and post translation regulation (Dataset S3, sheet 4). Similarly, 66% of  
296 the 2222 DEGs that were down-regulated in OP42 at T1 compared to T0 were specifically  
297 differentially expressed in OP42 (Fig. 3c). In contrast to the up-regulated genes, the GO  
298 enrichment analysis showed a significant enrichment of GO in cellular components, biological  
299 processes or molecular functions related to abiotic stress responses (Dataset 3, sheet 5). When  
300 the two genotypes were compared to each other, 25% of the 17,997 genes were differentially  
301 expressed between OP42 and T89 at T0 (Fig. 3a, Dataset S2) among which, 2007 were up-  
302 regulated in T89 compared to OP42 (Fig. 3a) while 2533 were down-regulated (Fig. 3a, Dataset  
303 S2, sheets 2 to 4). This difference between the two genotypes was reduced to 14% 24 h after  
304 transfer into hydroponic conditions, with 1156 up-regulated and 1330 down-regulated in T89  
305 compared to OP42 (Fig. 3a, Dataset S2, sheets 5 to 7). The genes that were differentially  
306 expressed between T89 and OP42 are mostly involved in cellular and chemical homeostasis,  
307 photosynthesis, dioxygenase activity and protein synthesis (Dataset S3, sheets 4 and 5).

308

### 309 **Genes related to cambium or vascular tissues behaved similarly in both genotypes**

310 After checking the similarity of the biological replicates (Fig. S3a-b), we also confirmed the  
311 quality and the specificity of the Dataset. For this, we selected a list of 40 Arabidopsis genes  
312 described as being expressed in the cambium or vascular tissues, and checked the expression  
313 of their putative *Populus* orthologues in our Dataset (Fig. S3c and Dataset S3, sheet 1). All were

314 found to be expressed (and most behaved similarly) in the two genotypes, showing a slight up-  
315 regulation or down-regulation in OP42 and T89 between T0 and T1 (Fig. S3c and Dataset S3,  
316 sheet 1). A few exceptions to this general pattern included Potri.003G111500 (*PtrPPNRT1.2*),  
317 Potri.004G223900 (similar to *AtCLAVATA1-related* gene) and Potri.014G025300 (similar to  
318 *AtWOX4b*) which were slightly down-regulated in T89 but up-regulated in OP42 24 h after  
319 cutting; additionally, a few genes were up-regulated in T89 compared to OP42 at T0 and T1.  
320 They comprise Potri.003G111500 (*PtrPPNRT1.2*), Potri.001G131800 (similar to Arabidopsis  
321 *BREVIS RADIX* gene) and Potri.002G024700 (*ARF5*), Potri.009G017700, which is similar to  
322 *AtLONESOME HIGHWAY*, a *bHLH* master transcriptional regulator of the initial process of  
323 vascular development.

324

### 325 **Genes encoding Reactive Oxygen Species scavenging proteins are mostly up-regulated in** 326 **OP42 compared to T89**

327 Reactive oxygen species (ROS) are signalling molecules involved in the response to biotic and  
328 abiotic stress as well as many aspects of plant development, including AR formation, as shown  
329 by recent studies (reviewed in Nag *et al.*, 2013; Li *et al.*, 2017; Velada *et al.*, 2018). We  
330 therefore searched genes encoding ROS scavenging proteins among all DEGs in T89 and OP42.  
331 We identified 43 differentially expressed genes encoding ROS scavenging proteins, 33 of  
332 which belong to the GLUTATHIONE S-TRANSFERASE superfamily (GSTs) and ten to the  
333 PEROXIDASE superfamily (Dataset S3 sheet 3). Twenty of these genes were up-regulated at  
334 T1 compared to T0 in both genotypes, but on average the fold change was higher in OP42 than  
335 in T89 (Fig. S5; Dataset S3, sheet 3); nine genes were repressed 24 h after cutting in both  
336 genotypes. The most striking observation was that 32 out of 43 genes were significantly up-  
337 regulated in OP42 compared to T89 at T1, and 21 of those were also up-regulated in OP42 at  
338 T0 (Dataset S3, sheet 3); only six were up-regulated in T89 compared to OP42 at T0 and T1;  
339 four were up-regulated in T89 compared to OP42 at T0 but down-regulated in T89 compared  
340 to OP42 at T1; and five were up-regulated in OP42 compared to T89 at T0 - but by contrast -  
341 up-regulated in T89 at T1.

342

### 343 **The easy-to-root OP42 shows an increased transcriptional activity in the cambium** 344 **compared to the difficult-to-root T89**

345 The different stages of AR initiation (ARI) in *Populus* are associated with substantial  
346 remodelling of the transcriptome (Ramirez-Carvajal *et al.*, 2009; Rigal *et al.*, 2012). We  
347 therefore focused our analysis on the expression of transcription factors (TFs). From the 58

348 families of TF identified in *Populus*, 49 families were represented in the DEG list (Table 1;  
349 dataset S2; dataset S3, sheet 2) and most of the DEGs were observed in OP42 (Table 1). 24 h  
350 after cutting, 210 and 209 TF were up- or down-regulated respectively in OP42, while in T89  
351 there were only 89 up-regulated and 43 down-regulated (Table 1). The most represented DEGs  
352 belong to the *ARF*, *bHLH*, *bZIP*, *C2H2*- and *C3H*- type zinc-finger family, *ERF*, *LBD*, *MYB*,  
353 *MYB-related*, *NAC* and *WRKY* families. Several genes belonging to those TF families have  
354 been shown to be involved in the control of adventitious rooting in *Populus* species (reviewed  
355 in Legue *et al.*, 2014).

356 The *APETALA2/ETHYLENE RESPONSE FACTOR (AP2/ERF)* family was the most  
357 represented with 21 and 42 *ERF* genes up-regulated at T1 in T89 and OP42, respectively (Table  
358 1 and Dataset S3, sheet 2). Twenty of the *ERFs* up-regulated in T89 were also up-regulated in  
359 OP42 24 h after cutting. Among the 22 specifically up-regulated in OP42, we found *PtrERF003*  
360 (Potri.018G085700; log<sub>2</sub> FC = 7.7) (Dataset S3, sheet 2) which has been shown to be a positive  
361 regulator of AR development in *Populus* (Trupiano *et al.*, 2013) and the *PtrERF39*  
362 (Potri.003G071700) a likely orthologue of the oxygen sensing *AtRAP2.12* (At1g53910) which  
363 has recently been shown to be involved in the primary root inhibition upon oxygen deficiency  
364 in *Arabidopsis* (Shukla *et al.*, 2020). Several *WUSHEL-Like Homeobox* genes, have been  
365 shown to positively control AR development in *Populus* species (Li *et al.*, 2018; Liu *et al.*,  
366 2014a; Liu *et al.*, 2014b; Xu *et al.*, 2015). More specifically, the *P. tomentosa PtoWOX5a*  
367 (Potri.008G065400) (Li *et al.*, 2018), and the *Populus × euramericana PeWOX11/12ba*  
368 (Potri.013G066900) and *PeWOX11/12b* (Potri.019G040800) (Xu *et al.*, 2015) have been found  
369 to be involved in AR development in poplar; nevertheless, they were not expressed in the  
370 cambium cells of OP42 or T89 (Dataset S1). By contrast, we found that two paralogues of  
371 *PtrWOX13*, *PtrWOX13a* (Potri.005G101800) and *PtrWOX13b* (Potri.005G252800) were up-  
372 regulated in OP42 24 h after cutting and transfer in hydroponic conditions (Dataset S3, sheet  
373 2). *PtrWOX13* belongs to an ancient clade of *PtrWOX* genes (Liu *et al.*, 2014b) and the  
374 *Arabidopsis AtWOX13* and *AtWOX14* are involved in the regulation of primary and lateral root  
375 development in *Arabidopsis* (Deveaux *et al.*, 2008).

376  
377 Recently (Wei *et al.*, 2020) showed that the *P. ussuriensis PuHox52* gene, which belongs to the  
378 HD-Zip subfamily of TF is a positive regulator of adventitious rooting in *P. ussuriensis*. It acts  
379 by inducing nine regulatory hubs including the JA signalling pathway *PuMYC2* gene  
380 (MH644082; Potri.002G176900), a TF from the *bHLH* family, which has been demonstrated  
381 to be a positive regulator of AR development in *P. ussuriensis*. By contrast, in our dataset, we

382 found that *P. trichocarpa* *PtrHox52* (Potri.014G103000) was down-regulated in the cambium  
383 of the easy-to-root genotype OP42 at T1 *i.e.*, 24 h after cutting and transferred to hydroponic  
384 conditions (Dataset 3, sheet 2). *PtrHox52* was also up-regulated in the difficult-to-root genotype  
385 T89 compared to OP42 at T1 (Dataset S3, sheet 2). Accordingly, we observed that *PtrMYC2.5*  
386 (Potri.003G147300) was up-regulated in the cambium of T89 compared to OP42 at T1. There  
387 are six paralogues of *MYC2* in *Populus*. Three of them - *PtrMYC2.1* (Potri.003G092200),  
388 *PtrMYC2.2* (Potri.001G142200), *PtrMYC2.4* (Potri.001G083500) - were up-regulated in both  
389 T89 and OP42 at T1, but with a higher fold change in T89, while *PtrMYC2.5*  
390 (Potri.003G147300) was exclusively up-regulated in T89 at T1, which led to a significant  
391 increase in *PtrMYC2* expression in T89 compared to OP42 (Dataset S3, sheet 2). The potential  
392 up-regulation of JA signalling in T89 was corroborated by a higher fold change in the  
393 expression of several JA inducible *JA ZIM DOMAIN* (*JAZ*) genes 24 h after cutting in T89  
394 compared to OP42. *PtrJAZ6* (Potri.003G068900), *PtrJAZ8* (Potri.011G083900) and *PtrJAZ10*  
395 (Potri.001G062500) were up-regulated in T89 compared to OP42 at T1 with a respective log<sub>2</sub>  
396 FC of 4.25, 5.5 and 4.7 (Dataset S2, sheet 6). These results suggest a negative role of JA  
397 signalling on AR development as described in Arabidopsis (Gutierrez *et al.*, 2012; Lakehal *et*  
398 *al.*, 2020a) and contradict the positive role of JA on AR development as described for *P.*  
399 *ussuriensis* (Wei *et al.*, 2020).

400 Several genes from the *AUXIN RESPONSE FACTOR* (*ARF*) have been shown to be involved  
401 in AR development in Arabidopsis and *Populus* (Gutierrez *et al.*, 2009; Gutierrez *et al.*, 2012;  
402 Lakehal *et al.*, 2019; Cai *et al.*, 2019; Liu *et al.*, 2020). *AtARF6* and *AtARF8* are positive  
403 regulators of ARI while *AtARF17* negatively regulates adventitious rooting (Gutierrez *et al.*,  
404 2009). In *Populus*, *PeARF8* also positively regulates AR formation (Cai *et al.*, 2019) but  
405 *PeARF17*, in contrast to the Arabidopsis gene, acts as a positive regulator of AR development  
406 in the hybrid poplar *P. davidiana* × *P. bolleana* (Liu *et al.*, 2020). We identified 36 *PtrARF*  
407 genes encoding paralogues of 15 out of the 27 Arabidopsis *ARFs* orthologues. Although some  
408 of them were more significantly down-regulated in OP42 than in T89 24 h after cutting, they  
409 mostly behaved similarly in both genotypes (Fig. S6; Dataset S3, sheet 6). In particular,  
410 *PtrARF6.2* (Potri.002G055000) and *PtrARF6.3* (Potri.001G358500) were up-regulated while  
411 *PtrARF6.1* (Potri.005G207700) and *PtrARF6.4* (Potri.011G091900) were down-regulated in  
412 both T89 and OP42 at T1 compared to T0 (Fig. S6; Dataset S3, sheet 6). Similarly, both  
413 *PtrARF8.1* (Potri.004G078200) and *PtrARF8.2* (Potri.017G141000) were down-regulated at  
414 time T1 compared to T0 in both T89 and OP42. Interestingly, *PtrARF17.1* (Potri.002G089900)  
415 was significantly less expressed in the cambium of the difficult-to-root T89 than in OP42 at

416 both time T0 and T1, which agrees with a potential positive role of *PtARF17.1* in AR  
417 development.

418

419 ***PttARF6* and *PttARF8* positively control adventitious rooting in hybrid aspen while**  
420 ***PttARF17* is a potential negative regulator.**

421 To assess the role of *PttARF6*, *PttARF8* and *PttARF17* in adventitious rooting in *Populus*, we  
422 produced transgenic plants that either over-expressed them or down-regulated their expression.  
423 Using the PopGenIE data base (<http://popgenie.org>) we identified the *Populus* genes most  
424 closely related to the Arabidopsis ones (Fig. S6a) and checked their expression pattern in the  
425 cambium and wood-forming region in the AspWood database  
426 (<http://aspwood.popgenie.org/aspwood-v3.0/>; Sundell *et al.*, 2017). AspWood provides high  
427 resolution *in silico* transcript expression profiling of the genes expressed over the phloem,  
428 cambium, and other xylem development zones in aspen trees. We observed, *PttARF6.1/2/3/4*  
429 and *PttARF8.1/2* to be highly expressed in the phloem/cambium region while *PttRF17.1/2*  
430 exhibited very low expression in the same region (Fig. S4B-D).

431 For the over-expressing lines *PttARF6.4* and *PttARF8.1*, coding sequences were cloned under  
432 the control of the 35S promoter of the Cauliflower Mosaic Virus (CaMV) or the promoter of  
433 the cambium specific gene *PttHB3a* (Schrader *et al.*, 2004). For down-regulated lines RNAi  
434 constructs were made to target *PttARF6.3* and *4*, *PttARF8.1* and *2*, and *PttARF17.1* and *2*  
435 paralogues. We had previously shown that in Arabidopsis hypocotyl, *AtARF6*, *AtARF8* and  
436 *AtARF17* regulate each other's expression at the transcriptional and post-transcriptional level  
437 and that the balance between positive and negative regulators determined the average number  
438 of AR (Gutierrez *et al.*, 2009). As in Arabidopsis, the *Populus ARFs* are regulated by  
439 microRNAs (Cai *et al.*, 2019; Liu *et al.*, 2020). We therefore checked the relative transcript  
440 amount of the un-cleaved transcript of the three *ARF* types in each transgenic line. A multiple  
441 sequence alignment analysis revealed that the coding sequences (CDS) of *PttARF6.1* and  
442 *PttARF6.2* paralogues were highly similar, and we were unable to differentiate their expression  
443 level by q-PCR. A similar situation occurred with *PttARF6.3* and *PttARF6.4*, *PttARF8.1* and  
444 *PttARF8.2*, *PttARF17.1* and *PttARF17.2*., We therefore designed primers to span the  
445 microRNA cleaving site and measured the cumulative expression level of the two paralogues  
446 (designated *PttARF6\_1+2*; *PttARF2\_3+4*; and *PttARF17\_1+2*) (Fig. 4 and Fig. S7a, b).

447 We confirmed the over-expression of *PttARF6\_3+4* and *PttARF8\_1+2* in the over-expressing  
448 lines (Fig. 4a,b and Fig. S7a,b), and the down-regulation of *PttARF6\_3+4*, *PttARF8\_1+2* and  
449 *PttARF17\_1+2* in the RNAi lines (Fig. 4c-e). Interestingly, we observed that, as in Arabidopsis,

450 when the expression of one of the three ARFs was modified, the expression of the others was  
451 also affected, establishing a different ratio between potential positive and negative regulators  
452 (Fig. 4 and Fig. S7).

453 We performed rooting assays to check the aptitude of the different transgenic lines in producing  
454 AR. When either *PttARF6.4* or *PttARF8.2* was over-expressed in the cambium under the control  
455 of the *PttHB3* promoter, the transgenic lines produced more AR than the control T89 (Fig.  
456 5a,b). Similar results were obtained with *PttARF6.4* under the 35S promoter (Fig. S7c) but not  
457 with *p35SPttARF8.2* (Fig. S7d). The positive effect of *PttARF6* and *PttARF8* was confirmed in  
458 the RNAi lines, which produced fewer AR than the control line T89 (Fig. 5c,d). The role of  
459 *PttARF17* was unclear, although it has been described as a positive regulator in the hybrid  
460 poplar *P. davidiana* × *P. bolleana* (Liu *et al.*, 2020). However, our results show that when  
461 *PttARF17\_1+2* is down-regulated the transgenic lines produce more AR (Fig. 5E) suggesting  
462 that *PttARF17.1* or *PttARF17* could be negative regulators. Nevertheless, because  
463 *PttARF6\_3+4* were up-regulated in the *PttARF17* RNAi lines (Fig. 4e), it is difficult to  
464 conclude whether the increased AR average number was solely due to the down-regulation of  
465 *PttARF17*, to the over-expression of *PttARF6\_3+4*, or to a combination of both.

466

#### 467 ***PtMYC2.1* is a negative regulator of adventitious root development in hybrid aspen**

468 In Arabidopsis, the *AtARF6*, *AtARF8* and *AtARF17* have been shown to act upstream of  
469 *AtMYC2*, which is a negative regulator of AR development (Gutierrez *et al.*, 2012; Lakehal *et*  
470 *al.*, 2020a). In our present study, five out of the six *PttMYC2* paralogues are shown to be among  
471 the DEGs (Fig. 6a, Dataset S3, sheet 2). They mostly behaved the same way in both T89 and  
472 OP42, but the fold change induction was higher for four of them at T1 in the difficult-to-root  
473 genotype T89, and *PtMYC2.5* was significantly up-regulated in T89 compared to OP42 24 h  
474 after cutting (Fig. 6a, Dataset S3, sheet 2). These results suggest that *PttMYC2* could be a  
475 negative regulator of adventitious rooting in hybrid aspen. To confirm this hypothesis, we  
476 produced transgenic hybrid aspen trees over-expressing *PttMYC2.1* under the 35S promoter.  
477 The over-expression was confirmed in two independent transgenic lines by qPCR (Fig. 6b) and  
478 the rooting assays confirmed that over-expressing *PttMYC2.1* repressed AR development (Fig.  
479 6c). The up-regulation of the JA signalling pathway in T89 cambium compared to OP42 could  
480 contribute to the recalcitrance of stem cuttings from greenhouse-grown plants to produce AR.  
481 This led us to compare the behaviour of OP42 and T89 in response to exogenous JA. Rooting  
482 assays were performed with *in vitro* propagated T89 and OP42 plants in the absence or presence  
483 of increasing concentrations of JA (Fig. 6 c,d). We observed that even though the two genotypes

484 root similarly under *in vitro* conditions, they showed a different response to exogenous JA. The  
485 difficult-to-root T89 was more sensitive to exogenously applied JA compared to OP42 (Fig. 6  
486 c,d)

487

## 488 **Discussion**

489 *Populus* species are among the most economically utilised trees. Their ability to be propagated  
490 vegetatively means that novel genotypes can be rapidly multiplied. Nevertheless, tree cloning  
491 is often limited by the difficulty of developing AR from stem cuttings. Adventitious rooting is  
492 a complex multifactorial process. Many QTL have been detected for adventitious rooting-  
493 related traits (Ribeiro *et al.*, 2016; Sun *et al.*, 2019; Zhang *et al.*, 2009) highlighting the genetic  
494 complexity of this trait. With the emergence of Arabidopsis as a genetic model, many genes  
495 and signalling pathways involved in the control of AR development have been identified  
496 (Gutierrez *et al.*, 2009; Gutierrez *et al.*, 2012; Hu and Xu, 2016; Lakehal *et al.*, 2019; Lakehal  
497 *et al.*, 2020a; Lakehal *et al.*, 2020b; Liu *et al.*, 2014b; Sorin *et al.*, 2005), and lately, several  
498 groups have focused on AR development in *Populus* and identified genes and gene networks  
499 involved in this process (Cai *et al.*, 2019; Legue *et al.*, 2014; Li *et al.*, 2018; Ramirez-Carvajal  
500 *et al.*, 2009; Trupiano *et al.*, 2013; Wei *et al.*, 2020; Xu *et al.*, 2021; Xu *et al.*, 2015; Yordanov  
501 *et al.*, 2017; Yue *et al.*, 2020; Zhang *et al.*, 2020). Nevertheless, despite all this research, most  
502 has so far focused on successive AR development stages in a given genotype; there have been  
503 no comparisons between easy-to-root and difficult-to-root genotypes.

504 To understand the underlying causes of poor-rooting and good-rooting in different genotypes  
505 we compared the hybrid poplar clone OP42, which is easily propagated from dormant stem  
506 cuttings, and the hybrid aspen clone T89, which is unable to develop AR under the same  
507 conditions.

508 Previous research has revealed that, predictably, AR form from specific founder cells in poplar  
509 stem cuttings, but that the process is highly dependent upon induction treatment and age of the  
510 cutting (Rigal *et al.*, 2012). Cambium cells have also been shown to be competent initiators of  
511 AR in *Eucalyptus* or *Populus* (Chao *et al.*, 2019; Chiatante *et al.*, 2010). Transcriptomic  
512 profiling of vascular tissues including the cambium region in *Populus* have been reported in  
513 several studies (Schrader, et al., 2004; de Almeida *et al.*, 2015; Kim *et al.*, 2019), but little  
514 attention has been given to gene expression in *Populus* cambial cells during AR development.  
515 Rigal *et al.* (2012) showed that changes in the transcriptome occur in the cambium during the  
516 early stages of AR development in *Populus*. In our present study we performed a global



517 comparative transcriptomic analysis of the cambium of cuttings taken from OP42 and T89  
518 clones.

519 Interestingly, the juvenile plants from the two clones rooted similarly when grown *in vitro*. In  
520 both cases the AR originate from the cambium region. But the hybrid aspen T89, unlike the  
521 hybrid poplar OP42, was unable to develop roots from 3-month-old plants grown in the  
522 greenhouse. Aging is a well-known limiting factor for AR development (reviewed in Aumond  
523 Jr. *et al.*, 2017; Bellini *et al.*, 2014; Diaz-Sala *et al.*, 2002). What cellular and biochemical  
524 modifications occur during maturation and phase changes and how these events reconfigure  
525 molecular pathways that lead to the inhibition of ARI in mature tissues is still not well  
526 understood. A comparison of DNA methylation in samples from juvenile and mature chestnut  
527 cuttings has shown that aging is related to a progressive increase of methylated 5-  
528 deoxycytidines (Baurens *et al.*, 2004; Hasbun *et al.*, 2007; Monteuis *et al.*, 2008). In contrast,  
529 progressive reduction in DNA methylation by grafting of adult shoot scions of coast redwood  
530 (*Sequoia sempervirens*) onto juvenile rootstock resulted in the progressive restoration of  
531 juvenile traits and rooting competence (Huang *et al.*, 2012). The connection between phase  
532 changes and epigenetic gene regulation has been confirmed by the fact that several Arabidopsis  
533 mutants affected in phase change were also altered in the genesis of small RNAs (19–24-  
534 nucleotide RNAs), including both microRNAs and short interfering RNAs (Willmann and  
535 Poethig, 2005), and microRNA *miR156*, which, as one of the most evolutionally conserved  
536 miRNAs in plants, is one of the regulators of the ‘age pathway’ (reviewed in Wang, 2014).

537 Congruent with a potential effect of age-related mechanisms on gene expression, we observed  
538 that there were many more DEGs in OP42 than in T89, 24 hours after cutting and transfer to  
539 rooting conditions. There were many more transcription factors differentially expressed in  
540 OP42 suggesting a more extensive transcriptome reprogramming activity in the cambium  
541 during the early stages of ARI.

542 Interestingly, among the differentially expressed transcription factors we found that the *P.*  
543 *trichocarpa* *PtHox52* gene (Potri.014G103000) was down-regulated in the cambium of the  
544 easy-to-root genotype OP42 and up-regulated in the difficult-to-root genotype T89 compared  
545 to OP42 at T1. This is surprising since the *P. ussuriensis* *PuHox52* gene, has been described as  
546 a positive regulator of adventitious rooting in *P. ussuriensis* (Wei *et al.*, 2020). It was shown to  
547 induce nine regulatory hubs including the JA signalling pathway driven by the *PuMYC2* gene  
548 (MH644082; Potri.002G176900), which was confirmed to be a positive regulator of AR  
549 development in *P. ussuriensis*. By contrast, JA signalling appears to be up-regulated in the  
550 cambium of the difficult-to-root T89 genotype compared to OP42, and we confirmed that

551 *PtMYC2.1* negatively controls AR development in the hybrid aspen T89 as we had previously  
552 shown in Arabidopsis (Gutierrez *et al.*, 2012; Lakehal *et al.*, 2020a). These are intriguing  
553 results, but the role of JA in the control of AR is still not totally clear and seems to be context  
554 and species dependent (Lakehal *et al.*, 2020b). It will be interesting in the future to study  
555 whether *Populus MYC2* paralogues have acquired different functions depending on the species,  
556 the growth and vegetative propagation conditions. Although T89 and OP42 clones rooted  
557 similarly *in vitro*, T89 was more sensitive to exogenously applied JA. This result suggests that  
558 the higher up-regulation of the JA pathway in the cambium of T89 24 h after cutting could  
559 contribute to repress ARI.

560 Interestingly, the orthologues of the three Arabidopsis *ARF* genes that were shown to be either  
561 positive (*AtARF6*, *AtARF8*) or negative (*AtARF17*) regulators of ARI in Arabidopsis (Gutierrez  
562 *et al.*, 2009; Gutierrez *et al.*, 2012; Lakehal *et al.*, 2019) behaved similarly in both T89 and  
563 OP42. An exception is *PttARF17.1*, which was significantly less expressed in the cambium of  
564 the difficult-to-root T89 as compared to OP42 at both time points T0 and T1. This result agrees  
565 with a potential positive role of *PttARF17.1* in ARI as described for *PeARF17* in the hybrid  
566 poplar *P. davidiana* × *P. bolleana* (Liu *et al.*, 2020). Nevertheless, a down-regulation of  
567 *PttARF17.1* and *PttARF17.2* expression in T89 induced ARI suggesting a negative role for  
568 *PttARF17*. As in Arabidopsis (Gutierrez *et al.*, 2009) when the expression of one of the three  
569 *PttARFs* was perturbed, the expression of the others was modified. In our current case of the  
570 down-regulation of *PttARF17*, *PttARF6* paralogues were up-regulated, which probably  
571 contributed to increase ARI. As for *MYC2* genes, it is possible that different paralogues of  
572 *ARF17* have different functions depending on the species or the context.

573 There were many transcription factors that were either up- or down-regulated in OP42 at T1  
574 compared to T0 but not in T89, and their further characterisation may certainly further advance  
575 our understanding of the mechanisms differentiating difficult-to-root from easy-to-root  
576 genotypes.

577 Another interesting difference we observed between T89 and OP42 concerns the expression of  
578 genes encoding ROS scavenging proteins. We identified 43 of these genes among the DEGs,  
579 33 of which belong to the GST superfamily and 10 to the PEROXIDASE superfamily. The  
580 most striking observation was that 32 were significantly up-regulated in OP42 compared to T89  
581 at T1, and 21 of those were also up-regulated in OP42 at T0. Recent studies have shown that  
582 peroxidase activity positively regulates AR formation in different species (reviewed in Nag *et*  
583 *al.*, 2013; Li *et al.*, 2017; Velada *et al.*, 2018). It is therefore possible that the up-regulation of

584 most of these genes in the cambium of OP42 compared to T89 partially explains the difference  
585 in rooting competence.  
586  
587

588 **Acknowledgments**

589 The authors sincerely thank Dr Marta Derba Maceluch from the UPSC Microscopy platform,  
590 and Dr Nicolas Delhomme and the UPSC bioinformatic platform for their support with the data  
591 analysis; the personnel from the UPSC transgenic facility for the production of the transgenic  
592 plants; and Dr Didier Le Thiec from INRAE of Nancy for the use of cryostat and his help and  
593 useful suggestions.

594

595 **Funding**

596 This research was supported by the Ministry of Higher Education and Scientific Research in  
597 Iraq (to SA); by grants from the Knut and Alice Wallenberg Foundation and the Swedish  
598 Governmental Agency for Innovation Systems (VINNOVA), by grants from the Swedish  
599 research councils FORMAS, VR, Kempestiftelserna, and the Carl Tryggers Stiftelse (to CB).

600 This research was also supported by the Laboratory of Excellence ARBRE (ANR-11-LABX-  
601 0002-01), the Region Lorraine and the European Regional Development Fund (to FM and AK).

602

603 **Author contributions**

604 AR, IP, SA, VL and CB conceived and designed the experiments. AR, IP, SA, RS, AK and FB  
605 performed the experiments. AR and CB wrote the manuscript. SA, IP reviewed and edited the  
606 manuscript. All authors read, commented and approved the final article for publication. RB,  
607 VL and CB supervised the work. SA, FM, AK, RB and CB acquired funding.

608

609 **Data availability**

610 The RNA-seq data have been deposited at the European Nucleotide Archive  
611 (<http://www.ebi.ac.uk/ena/>) and will be available using the accession number PRJEB21558  
612 (OP42 and T89 data under PRJEB21549 and PRJEB21557, respectively).

613

614

615 **References**

616

617 **Abarca, D., and Díaz-Sala, C. 2009a.** Adventitious root formation in conifers. In:  
618 Adventitious Root Formation of Forest Trees and Horticultural Plants – from Genes to  
619 Applications. Eds: Niemi, K., and Scagel, C., eds. Kerala, India: *Research Signpost Publishers*.  
620 227.

621 **Abarca, D., and Díaz-Sala, C. 2009b.** Reprogramming adult cells during organ regeneration  
622 in forest species. *Plant Signal*  
623 *Behav* **4**:793-795.

624 **Aumond Jr., M.L., de Araujo Jr., A.T., de Oliveira Junkes, C.F., De Almeda, M.R.,**  
625 **Matsuura, H.N., de Costa, F., and Fett-Neto, A.G. 2017.** Events Associated with Early Age-  
626 Related Decline in Adventitious Rooting Competence of *Eucalyptus globulus* Labill. *Frontiers*  
627 *in Plant Science* **8**:1734.

628 **Bannoud, F. and Bellini, C. (2021)** Adventitious Rooting in *Populus* Species: Update and  
629 Perspectives. *Frontiers in Plant Science* **12**:668837

630 **Baurens, F.C., Nicolleau, J., Legavre, T., Verdeil, J.L., and Monteouis, O. 2004.** Genomic  
631 DNA methylation of juvenile and mature *Acacia mangium* micropropagated in vitro with  
632 reference to leaf morphology as a phase change marker. *Tree Physiol* **24**:401-407.

633 **Bellini, C., Pacurar, D.I., and Perrone, I. 2014.** Adventitious roots and lateral roots:  
634 similarities and differences. *Annu Rev Plant Biol* **65**:639-666.

635 **Bozzano, M., Jalonen, R., Thomas, E., Boshier, D., Gallo, L., Cavers, S., Bordács, S.,**  
636 **Smith, P., and Loo, J. 2014.** Genetic considerations in ecosystem restoration using native tree  
637 species. State of the World's Forest Genetic Resources – Thematic Study. Rome: *FAO and*  
638 *Biodiversity International*.

639 **Brunoni, F., Ljung, K., and Bellini, C. 2019.** Control of root meristem establishment in  
640 conifers. *Physiol. Plant.* **165**: 81–89.

641 **Cai, H., Yang, C., Liu, S., Qi, H., Wu, L., Xu, L.A., and Xu, M. 2019.** MiRNA-target pairs  
642 regulate adventitious rooting in *Populus*: a functional role for miR167a and its target Auxin  
643 response factor 8. *Tree Physiol* **39**:1922-1936.

- 644 **Carle, J., Ball, J.B., and del Lungo, A. 2008.** The global thematic study of planted forests. In:  
645 Planted forests: uses, impacts and sustainability.--Evans, J., ed. Wallingford (UK) and Rome  
646 (Italy): *CABI and FAO*. 33-46.  
647
- 648 **Chao, Q., Gao, Z.F., Zhang, D., Zhao, B.G., Dong, F.Q., Fu, C.X., Liu, L.J., and Wang,**  
649 **B.C. 2019.** The developmental dynamics of the *Populus* stem transcriptome. *Plant Biotechnol*  
650 *J* **17**:206-219.
- 651 **Chiatante, D., Beltotto, M., Onelli, E., Di Iorio, A., Montagnoli, A., and Scippa, S.G. 2010.**  
652 New branch roots produced by vascular cambium derivatives in woody parental roots of  
653 *Populus nigra*. *Plant Biosystems* **144**:420-433.
- 654 **de Almeida, M.R., de Bastiani, D., Gaeta, M.L., de Araujo Mariath, J.E., de Costa, F.,**  
655 **Retallick, J., Nolan, L., Tai, H.H., Stromvik, M.V., and Fett-Neto, A.G. 2015.** Comparative  
656 transcriptional analysis provides new insights into the molecular basis of adventitious rooting  
657 recalcitrance in Eucalyptus. *Plant Sci* **239**:155-165.
- 658 **Deveaux, Y., Toffano-Nioche, C., Claisse, G., Thareau, V., Morin, H., Laufs, P., Moreau,**  
659 **H., Kreis, M., and Lecharny, A. 2008.** Genes of the most conserved WOX clade in plants  
660 affect root and flower development in Arabidopsis. *BMC Evol Biol* **8**:291.
- 661 **Diaz-Sala, C., Garrido, G., and Sabater, B. 2002.** Age-related loss of rooting capability in  
662 Arabidopsis thaliana and its reversal by peptides containing the Arg-Gly-Asp (RGD) motif.  
663 *Physiol Plant* **114**:601-607.
- 664 **Dickmann, D.I. 2006.** Silviculture and biology of short-rotation woody  
665 crops in temperate regions: then and now. *Biomass Bioenergy* **30**:696-705.
- 666 **Dobin, A., Davis, C.A., Schlesinger, F., Drenkow, J., Zaleski, C., Jha, S., Batut, P.,**  
667 **Chaisson, M., and Gingeras, T.R. 2013.** STAR: ultrafast universal RNA-seq aligner.  
668 *Bioinformatics* **29**:15-21.
- 669 **Geiss, G., Gutierrez, L., and Bellini, C. 2009.** Adventitious root formation: new insights and  
670 perspective. In: Root Development - Annual Plant Reviews --Beeckman, T., ed. London:  
671 *Blackwell Publishing-CRC Press*. 127-156.

- 672 **Gentleman, R.C., Carey, V.J., Bates, D.M., Bolstad, B., Dettling, M., Dudoit, S., Ellis, B.,**  
673 **Gautier, L., Ge, Y., Gentry, J., et al. 2004.** Bioconductor: open software development for  
674 computational biology and bioinformatics. *Genome Biol* **5**:R80.
- 675 **Gou, J., Strauss, S.H., Tsai, C.J., Fang, K., Chen, Y., Jiang, X., and Busov, V.B. 2010.**  
676 Gibberellins regulate lateral root formation in *Populus* through interactions with auxin and  
677 other hormones. *Plant Cell* **22**:623-639.
- 678 **Gutierrez, L., Bussell, J.D., Pacurar, D.I., Schwambach, J., Pacurar, M., and Bellini, C.**  
679 **2009.** Phenotypic plasticity of adventitious rooting in Arabidopsis is controlled by complex  
680 regulation of AUXIN RESPONSE FACTOR transcripts and microRNA abundance. *Plant Cell*  
681 **21**:3119-3132.
- 682 **Gutierrez, L., Mauriat, M., Guenin, S., Pelloux, J., Lefebvre, J.F., Louvet, R., Rusterucci,**  
683 **C., Moritz, T., Guerineau, F., Bellini, C., and Van Wuytswinkel, O. 2008.** The lack of a  
684 systematic validation of reference genes: a serious pitfall undervalued in reverse transcription-  
685 polymerase chain reaction (RT-PCR) analysis in plants. *Plant Biotechnol J* **6**:609-618.
- 686 **Gutierrez, L., Mongelard, G., Flokova, K., Pacurar, D.I., Novak, O., Staswick, P.,**  
687 **Kowalczyk, M., Pacurar, M., Demailly, H., Geiss, G., et al. 2012.** Auxin controls Arabidopsis  
688 adventitious root initiation by regulating jasmonic acid homeostasis. *Plant Cell* **24**:2515-2527.
- 689 **Hamann, T., Smets, E., and Lens, F. 2011.** A comparison of paraffin and resin-based  
690 techniques used in bark anatomy. *Taxon* **60**:841-851.
- 691 **Hasbun, R., Valledor, L., Santamaria, E., Canal, M.J., and Rodriguez, R. 2007.** Dynamics  
692 of DNA methylation in chestnut trees development. In: Proc. 27th IHCS-S1 Plant Gen.  
693 Ressources--Hummer, K.E., ed.: *Acta Hort.* **760**. 563-566.
- 694 **Hu, X., and Xu, L. 2016.** Transcription Factors WOX11/12 Directly Activate WOX5/7 to  
695 Promote Root Primordia Initiation and Organogenesis. *Plant Physiol* **172**:2363-2373.
- 696 **Huang, L.C., Hsiao, L.J., Pu, S.Y., Kuo, C.I., Huang, B.L., Tseng, T.C., Huang, H.J., and**  
697 **Chen, Y.T. 2012.** DNA methylation and genome rearrangement characteristics of phase change  
698 in cultured shoots of *Sequoia sempervirens*. *Physiologia plantarum* **145**:360-368.

- 699 **Karlberg, A., Bako, L., and Bhalerao, R.P. 2011.** Short day-mediated cessation of growth  
700 requires the down regulation of AINTEGUMENTALIKE1 transcription factor in hybrid aspen.  
701 *PLoS Genet* **7**:e1002361.
- 702 **Kim, M.H., Cho, J.S., Jeon, H.W., Sangsawang, K., Shim, D., Choi, Y.I., Park, E.J., Lee,**  
703 **H., and Ko, J.H. 2019.** Wood Transcriptome Profiling Identifies Critical Pathway Genes of  
704 Secondary Wall Biosynthesis and Novel Regulators for Vascular Cambium Development in  
705 *Populus*. *Genes (Basel)* **10**.
- 706 **Kirilenko, A.P., and Sedjo, R.A. 2007.** Climate change impacts on forestry. *Proc Natl Acad*  
707 *Sci U S A* **104**:19697-19702.
- 708 **Kucukoglu, M., Nilsson, J., Zheng, B., Chaabouni, S., and Nilsson, O. 2017.** WUSCHEL-  
709 RELATED HOMEBOX4 (WOX4)-like genes regulate cambial cell division activity and  
710 secondary growth in *Populus* trees. *New Phytol* **215**:642-657.
- 711 **Lakehal, A., Chaabouni, S., Cavel, E., Le Hir, R., Ranjan, A., Raneshan, Z., Novak, O.,**  
712 **Pacurar, D.I., Perrone, I., Jobert, F., et al. 2019.** A Molecular Framework for the Control of  
713 Adventitious Rooting by TIR1/AFB2-Aux/IAA-Dependent Auxin Signaling in Arabidopsis.  
714 *Mol Plant* **12**:1499-1514.
- 715 **Lakehal, A., Dob, A., Rahnesan, Z., Novak, O., Escamez, S., Alallaq, S., Strnad, M.,**  
716 **Tuominen, H., and Bellini, C. 2020a.** ETHYLENE RESPONSE FACTOR 115 integrates  
717 jasmonate and cytokinin signaling machineries to repress adventitious rooting in Arabidopsis.  
718 *New Phytol* **228**:1611-1626.
- 719 **Lakehal, A., Ranjan, A., and Bellini, C. 2020b.** Multiple Roles of Jasmonates in Shaping  
720 Rhizotaxis: Emerging Integrators. *Methods Mol Biol* **2085**:3-22.
- 721 **Legue, V., Rigal, A., and Bhalerao, R.P. 2014.** Adventitious root formation in tree species:  
722 involvement of transcription factors. *Physiol Plant* **151**:192-198.
- 723 **Li, J., Zhang, J., Jia, H., Liu, B., Sun, P., Hu, J., Wang, L., and Lu, M. 2018.** The  
724 WUSCHEL-related homeobox 5a (PtoWOX5a) is involved in adventitious root development  
725 in poplar. *Tree Physiol* **38**:139-153.



- 726 **Li, S.W., Leng, Y., and Shi, R.F. 2017.** Transcriptomic profiling provides molecular insights  
727 into hydrogen peroxide-induced adventitious rooting in mung bean seedlings. *BMC Genomics*  
728 **18**:188.
- 729 **Liu, B., Wang, L., Zhang, J., Li, J., Zheng, H., Chen, J., and Lu, M. 2014a.** WUSCHEL-  
730 related Homeobox genes in *Populus tomentosa*: diversified expression patterns and a functional  
731 similarity in adventitious root formation. *BMC Genomics* **15**:296.
- 732 **Liu, J., Sheng, L., Xu, Y., Li, J., Yang, Z., Huang, H., and Xu, L. 2014b.** WOX11 and 12  
733 are involved in the first-step cell fate transition during de novo root organogenesis in  
734 *Arabidopsis*. *Plant Cell* **26**:1081-1093.
- 735 **Liu, S., Yang, C., Wu, L., Cai, H., Li, H., and Xu, M. 2020.** The peu-miR160a-  
736 PeARF17.1/PeARF17.2 module participates in the adventitious root development of poplar.  
737 *Plant Biotechnol J* **18**:457-469.
- 738 **Love, M.I., Huber, W., and Anders, S. 2014.** Moderated estimation of fold change and  
739 dispersion for RNA-seq data with DESeq2. *Genome Biol* **15**:550.
- 740 **Mauriat, M., Petterle, A., Bellini, C., and Moritz, T. 2014.** Gibberellins inhibit adventitious  
741 rooting in hybrid aspen and *Arabidopsis* by affecting auxin transport. *Plant J* **78**:372-384.
- 742 **Merret, R., Moulia, B., Hummel, I., Cohen, D., Dreyer, E., and Bogeat-Triboulot, M.B.**  
743 **2010.** Monitoring the regulation of gene expression in a growing organ using a fluid mechanics  
744 formalism. *BMC Biol* **8**:18.
- 745 **Monteuuis, O., Doubeau, S., and Verdeil, J.L. 2008.** DNA methylation in different origin  
746 clonal offspring from a mature *Sequoiadendron giganteum* genotype. *Trees-Struct Funct*  
747 **22**:779-784.
- 748 **Nag, S., Paul, A., and Choudhuri, M.A. 2013.** Changes in peroxidase activity during  
749 adventitious root formation at the base of mung bean cuttings. *Int. J. Sci. Technol. Res* **2**:171-  
750 177.
- 751 **Nilsson, O., T, A., Sitbon, F., Anthony Little, C.H., Chalupa, V., Sandberg, G., and Olsson,**  
752 **O. 1992.** Spatial pattern of cauliflower mosaic virus 35S promoter-luciferase expression in

- 753 transgenic hybrid aspen trees monitored by enzymatic assay and non-destructive imaging.  
754 *TransgenicResearch* **1**:209-220.
- 755 **Ragauskas, A.J., Williams, C.K., Davison, B.H., Britovsek, G., Cairney, J., Eckert, C.A.,**  
756 **Frederick, W.J., Jr., Hallett, J.P., Leak, D.J., Liotta, C.L., et al. 2006.** The path forward for  
757 biofuels and biomaterials. *Science* **311**:484-489.
- 758 **Ramirez-Carvajal, G.A., Morse, A.M., Dervinis, C., and Davis, J.M. 2009.** The cytokinin  
759 type-B response regulator PtRR13 is a negative regulator of adventitious root development in  
760 *Populus*. *Plant Physiol* **150**:759-771.
- 761 **Ribeiro, C.L., Silva, C.M., Drost, D.R., Novaes, E., Novaes, C.R., Dervinis, C., and Kirst,**  
762 **M. 2016.** Integration of genetic, genomic and transcriptomic information identifies putative  
763 regulators of adventitious root formation in *Populus*. *BMC Plant Biol* **16**:66.
- 764 **Rigal, A., Yordanov, Y.S., Perrone, I., Karlberg, A., Tisserant, E., Bellini, C., Busov, V.B.,**  
765 **Martin, F., Kohler, A., Bhalerao, R., et al. 2012.** The AINTEGUMENTA LIKE1 homeotic  
766 transcription factor PttIL1 controls the formation of adventitious root primordia in poplar. *Plant*  
767 *Physiol* **160**:1996-2006.
- 768 **Schrader, J., Nilsson, J., Mellerowicz, E., Berglund, A., Nilsson, P., Hertzberg, M., and**  
769 **Sandberg, G. 2004.** A high-resolution transcript profile across the wood-forming meristem of  
770 poplar identifies potential regulators of cambial stem cell identity. *Plant Cell* **16**:2278-2292.
- 771 **Shukla, V., Lombardi, L., Pencik, A., Novak, O., Weits, D.A., Loreti, E., Perata, P.,**  
772 **Giuntoli, B., and Licausi, F. 2020.** Jasmonate Signalling Contributes to Primary Root  
773 Inhibition Upon Oxygen Deficiency in *Arabidopsis thaliana*. *Plants* (Basel) **9**.
- 774 **Sorin, C., Bussell, J.D., Camus, I., Ljung, K., Kowalczyk, M., Geiss, G., McKhann, H.,**  
775 **Garcion, C., Vaucheret, H., Sandberg, G., et al. 2005.** Auxin and light control of adventitious  
776 rooting in *Arabidopsis* require ARGONAUTE1. *Plant Cell* **17**:1343-1359.
- 777 **Sun, P., Jia, H., Zhang, Y., Li, J., Lu, M., and Hu, J. 2019.** Deciphering Genetic Architecture  
778 of Adventitious Root and Related Shoot Traits in *Populus* Using QTL Mapping and RNA-Seq  
779 Data. *Int J Mol Sci* **20**.

- 780 **Sundell, D., Street, N.R., Kumar, M., Mellerowicz, E.J., Kucukoglu, M., Johnsson, C.,**  
781 **Kumar, V., Mannapperuma, C., Delhomme, N., Nilsson, O., et al. 2017.** AspWood: High-  
782 Spatial-Resolution Transcriptome Profiles Reveal Uncharacterized Modularity of Wood  
783 Formation in *Populus tremula*. *Plant Cell* **29**:1585-1604.
- 784 **Supek, F., Bosnjak, M., Skunca, N., and Smuc, T. 2011.** REVIGO summarizes and visualizes  
785 long lists of gene ontology terms. *PLoS One* **6**:e21800.
- 786 **Taeroe, A., Nord-Larsen, T., Stupak, I., and Raulund-Rasmussen, K. 2015.** Allometric  
787 biomass, biomass expansion factor and wood density models for the OP42 hybrid poplar in  
788 southern Scandinavia. *BioEnergy Research* **8**:1332-1343.
- 789 **Team, R.C. 2018.** R: A language and environment for statistical computing. In: Available  
790 online at <https://www.R-project.org/>--R Foundation for Statistical Computing, V., Austria, ed.
- 791 **Trupiano, D., Yordanov, Y., Regan, S., Meilan, R., Tschaplinski, T., Scippa, G.S., and**  
792 **Busov, V. 2013.** Identification, characterization of an AP2/ERF transcription factor that  
793 promotes adventitious, lateral root formation in *Populus*. *Planta* **238**:271-282.
- 794 **Tuskan, G.A., and Difazio, S., and Jansson, S., and Bohlmann, J., and Grigoriev, I., and**  
795 **Hellsten, U., and Putnam, N., and Ralph, S., and Rombauts, S., and Salamov, A., et al.**  
796 **2006.** The genome of black cottonwood, *Populus trichocarpa* (Torr. & Gray). *Science*  
797 **313**:1596-1604.
- 798
- 799 **Velada, I., Grzebelus, D., Lousa, D., C, M.S., Santos Macedo, E., Peixe, A., Arnholdt-**  
800 **Schmitt, B., and H, G.C. 2018.** AOX1-Subfamily Gene Members in *Olea europaea* cv.  
801 "Galega Vulgar"-Gene Characterization and Expression of Transcripts during IBA-Induced in  
802 Vitro Adventitious Rooting. *Int J Mol Sci* **19**.
- 803 **Wang, J.W. 2014.** Regulation of flowering time by the miR156-mediated age pathway. *J Exp*  
804 *Bot* **65**:4723-4730.
- 805 **Wang, L.-Q., Li, Z., Wen, S.-S., Wang, J.-N., Zhao, S.-T., and Lu, M.-Z. 2020.** WUSCHEL-  
806 related homeobox gene PagWOX11/12a responds to drought stress by enhancing root  
807 elongation and biomass growth in poplar. *Journal of Experimental Botany* **71**:1503-1513.

808

809 **Wei, M., Liu, Q., Wang, Z., Yang, J., Li, W., Chen, Y., Lu, H., Nie, J., Liu, B., Lv, K., et**  
810 **al. 2020.** PuHox52-mediated hierarchical multilayered gene regulatory network promotes  
811 adventitious root formation in *Populus ussuriensis*. *New Phytol* **228**:1369-1385.

812 **Willmann, M.R., and Poethig, R.S. 2005.** Time to grow up: the temporal role of smallRNAs  
813 in plants. *Current opinion in plant biology* **8**:548-552.

814 **Wuddineh, W.A., Mazarei, M., Turner, G.B., Sykes, R.W., Decker, S.R., Davis, M.F., and**  
815 **Stewart, C.N., Jr. 2015.** Identification and Molecular Characterization of the Switchgrass  
816 AP2/ERF Transcription Factor Superfamily, and Overexpression of PVERF001 for  
817 Improvement of Biomass Characteristics for Biofuel. *Front Bioeng Biotechnol* **3**:101.

818 **Xu, C., Tao, Y., Fu, X., Guo, L., Xing, H., Li, C., Yang, Z., Su, H., Wang, X., Hu, J., et al.**  
819 **2021.** The microRNA476a-RFL module regulates adventitious root formation through a  
820 mitochondria-dependent pathway in *Populus*. *New Phytol*.

821 **Xu, M., Xie, W., and Huang, M. 2015.** Two WUSCHEL-related HOMEBOX genes,  
822 PeWOX11a and PeWOX11b, are involved in adventitious root formation of poplar. *Physiol*  
823 *Plant* **155**:446-456.

824 **Yordanov, Y.S., Ma, C., Yordanova, E., Meilan, R., Strauss, S.H., and Busov, V.B. 2017.**  
825 BIG LEAF is a regulator of organ size and adventitious root formation in poplar. *PLoS One*  
826 **12**:e0180527.

827 **Yue, J., Yang, H., Yang, S., and Wang, J. 2020.** TDIF regulates auxin accumulation and  
828 modulates auxin sensitivity to enhance both adventitious root and lateral root formation in  
829 poplar trees. *Tree Physiol* **40**:1534-1547.

830 **Zhang, B., Tong, C., Yin, T., Zhang, X., Zhuge, Q., Huang, M., Wang, M., and Wu, R.**  
831 **2009.** Detection of quantitative trait loci influencing growth trajectories of adventitious roots in  
832 *Populus* using functional mapping. *Tree genetics & genomes* **5**:539-552.

833 **Zhang, Y., Xiao, Z., Zhan, C., Liu, M., Xia, W., and Wang, N. 2019.** Comprehensive  
834 analysis of dynamic gene expression and investigation of the roles of hydrogen peroxide during  
835 adventitious rooting in poplar. *BMC Plant Biol* **19**:99.

836 **Zhang, Y., Yang, X., Cao, P., Xiao, Z., Zhan, C., Liu, M., Nvsvrot, T., and Wang, N. 2020.**  
837 The bZIP53-IAA4 module inhibits adventitious root development in *Populus*. *J Exp Bot*  
838 **71**:3485-3498.  
839  
840

841 **The following Supporting Information is available for this article:**

842

843 **Methods S1** Plant growth conditions and rooting assays

844 **Methods S2** Histological analysis of stem cuttings *in vitro*

845 **Methods S3** Tissue preparation before laser capture microdissection

846 **Methods S4** Pre-processing of RNA-Seq data

847 **Methods S5** Generation of plasmid constructs and transformation of hybrid aspen

848 **Methods S6** Quantitative Real-Time PCR analysis

849

850 **Fig. S1** Conditions for adventitious rooting assays from *in vitro* plants and greenhouse-grown  
851 plants

852 **Fig. S2:** Workflow for laser capture microdissection (LCMS) of cambium tissues from stem  
853 cuttings

854 **Fig. S3:** Quality assessment of the RNAseq data in the different biological replicates

855 **Fig. S4:** *Populus Arabidopsis* orthologues of *ARF6*, *ARF8* and *ARF17* and their expression  
856 pattern in wood-forming tissues

857 **Fig.S5:** Heat map showing the average expression of genes encoding ROS scavenging proteins  
858 in the cambium of T89 and OP42 genotypes

859 **Fig.S6:** Heat map showing the average expression of *PtARF* genes in the cambium of T89  
860 and OP42 genotypes

861 **Fig. S7: Over-expression** of *PtAF6.4* and *PtARF8.2* under the 35S promoter

862 **Table S1** Primer list used in the present study.

863 **Dataset S1** (excel document):

864 **Sheet 1** Library-size-normalised variance-stabilised data set

865 **Sheet 2** Expression values for the 17,997 expressed genes

866 **Dataset S2:** Differentially expressed genes

867 **Sheet 1** The differentially expressed genes (DEG) up- and down-regulated and their  
868 annotation.

869 **Sheet 2** Total number of DEG in OP42 when compared at time T1 and T0.

870 **Sheet 3** The DEG up-regulated in OP42 at time T1 compared to time T0.

871 **Sheet 4** The DEG down-regulated in OP42 at time T1 compared to time T0.

872 **Sheet 5** Total number of DEG in T89 when compared at time T1 and T0.

873 **Sheet 6** The DEG up-regulated in T89 at time T1 compared to time T0.

874 **Sheet 7** The DEG down-regulated in T89 at time T1 compared to time T0.

875 **Sheet 8** The total number of DEG in OP42 and T89 at time T0.

876 **Sheet 9** The number of DEG up-regulated in T89 compared to OP42 at timeT0.

877 **Sheet 10** The number of DEG down-regulated in T89 compared to OP42 at timeT0.

878 **Sheet 11** Total number of DEG between T89 and OP48 at time T1.

879           **Sheet 12** The number DEG up-regulated in T89 compared to OP42 at time T1.  
880           **Sheet 13** The number of DEG down-regulated in T89 compared to OP42 at time T1.  
881   **Dataset S3**  
882           **Sheet 1** Vascular tissue expressed genes set.  
883           **Sheet 2** Differentially expressed Transcription Factors.  
884           **Sheet 3** Differentially expressed ROS scavenging proteins  
885           **Sheet 4** Gene Ontology of up-regulated DEGs.  
886           **Sheet 5** Gene Ontology of down-regulated DEGs.  
887           **Sheet 6** Mean of expression values used for the heat maps  
888  
  
889

890 **Figure Legends**

891

892 **Fig.1: Pattern of adventitious rooting in hybrid aspen and hybrid poplar *in vitro*.**

893 (a) Average number of adventitious roots (AR) and percentage of rooted cuttings in T89 and  
894 OP42. Fifteen 3-cm-long cuttings, starting from the shoot apex, were taken from 4-week-old  
895 plantlets, amplified *in vitro*, and transferred onto half-strength MS medium as shown in Figs  
896 S1a,b,d). The emerged AR were scored starting on day 5 after transfer on fresh medium, until  
897 day 15. Data from three independent biological replicates, each of 15 stem cuttings, were pooled  
898 and averaged. Error bars indicate standard error.

899 (b to e) In T89, AR developed all around the base of the cuttings in a crown-like formation as  
900 arrowed.

901 (f to i) In OP42, AR developed few mm above the base of the cuttings and along the stem as  
902 arrowed.

903 (j to q) Cross- (j, l, n, p) and longitudinal (k, m, o, q) sections show that in both cases the AR  
904 primordia develop from cells situated in the cambium/phloem region. CZ = cambial zone; P =  
905 Phloem; X = Xylem; APR = Adventitious root primordium; AR = Adventitious root.

906

907 **Fig.2: Adventitious root development in woody stem cuttings under hydroponic**  
908 **conditions**

909 (a) Average number of adventitious roots (AR) and rooting percentage in T89 and OP42. About  
910 20 cm lengths of stem from three-month-old greenhouse-grown hybrid aspen T89 and OP42  
911 plants. The stem cuttings were kept in hydroponic conditions for five weeks and the number of  
912 AR was scored every day after cutting (DAC). Data from three biological replicates, each of at  
913 least 15 stem cuttings, were pooled and averaged. Error bars indicate standard error. (b) In T89  
914 only lenticels were observed (white arrows).

915 (c) In OP42, bulges of AR primordia were observed three DAC, and fully developed into AR  
916 13 DAC (black arrows). Lenticels were also observed in OP42 cuttings (white arrows).

917 (d, e) Cross-sections at the level of a lenticel (white arrows) in T89 (d) and OP42 (e). X =  
918 xylem; C = cambium; P = phloem.

919

920 **Fig.3: Number of differentially expressed genes (DEGs) between T89 and OP42**

921

922 (a) Total number of differentially expressed genes up- and down-regulated in T89 and OP42.  
923 Venn diagram of DEGs between T89 and OP42



924 (b) Up-regulated (c) Down-regulated. Abbreviations signify as follows:  
925 T1-T89-vs-OP42; genes are up- or down-regulated in T89 compared to OP42 at time T1. T0-  
926 T89-vs-OP42; genes are up- or down-regulated in T89 compared to OP42 at time T0. T89-T1-  
927 vs-T0; genes are up- or down-regulated at time T1 compared to time T0 in T89. OP42-T1-vs-  
928 T0; genes are up- or down-regulated at time T1 compared to time T0 in OP42.

929

930 **Fig. 4: Relative un-cleaved transcript amount of *PtARF6.1/2*, *PtARF6.3/4*, *PtARF8.1/2*,**  
931 ***PtARF17.1/2* in transgenic lines overexpressing or downregulated for *PtARF6*, *PtARF8* or**  
932 ***PtARF17***

933 The *PtARF6.1/2*, *PtARF6.3/4*, *PtARF8.1/2*, *PtARF17.1/2* un-cleaved transcript abundance was  
934 quantified in stem cutting fragments of independent over-expressing (a, b) or down-regulated  
935 (c-e) lines.

936 Gene expression values are relative to the reference genes and calibrated toward the expression  
937 in the control line T89, for which the value is set to 1.

938 Error bars indicate SE obtained from three independent biological replicates. A one-way  
939 analysis of variance combined with the Dunnett's comparison post-test indicated that the values  
940 marked with an asterisk differed significantly from T89 values ( $P < 0.05$ ;  $n = 3$ ).

941

942 **Fig. 5: *PtARF6* and *PtARF8* positively control adventitious root (AR) development while**  
943 ***PtARF17* is a negative regulator.**

944 (a, b) Average number of AR on cuttings of transgenic plants expressing *PtARF6.4* (a) and  
945 *PtARF8.2* (b) under the cambium specific promoter *pPtHB3*. Rooting assay was performed as  
946 described in Material and Methods. Two independent transgenic lines were compared to the  
947 control T89. AR number was scored every day starting day 5 after cutting until 14 days after  
948 cut (DAC). For each line 15 cuttings were analysed.

949 (c-e) Average number of AR on cuttings of transgenic plants expressing the *p35S:PtARF6.2-*  
950 *RNAi* (c), *p35S:PtARF8.4-RNAi* (d) or *p35S:PtARF17.2-RNAi* (e) constructs. Two independent  
951 transgenic lines were compared to the T89 control. AR number was scored every day starting  
952 day 5 after cutting until 14 DAC. For each line 15 cuttings were analysed.

953 Data are means  $\pm$  SE,  $n = 15$ , corresponding to two independent lines per construct. A two-way  
954 ANOVA with a Tukey's multiple comparisons test indicated that the difference between the  
955 transgenic lines and the control were significant, except for *PtHB3a:ARF6.4* line 779-L-9 for  
956 which the difference was significant only from day 8 to 12, and *PtARF8-RNAi* L-1 for which no  
957 significant difference was observed.

958

959 **Fig. 6: Jasmonate is a negative regulator of AR development in hybrid aspen cuttings**

960 (a) The expression of five out of six *PtMYC2* paralogues found in the transcriptomic data set  
961 presented as a heat map clustering in T89 and OP42 at time T0 and T1. Colours indicate low  
962 expressed genes (blue) or highly expressed genes (red)

963 (b) *PtMYC2.1* transcript abundance was quantified in stem cutting fragments of two  
964 independent transgenic T89 lines over-expressing *PtMYC2.1* under the 35S promotor (lines  
965 692-2 and 692-3).

966 Gene expression values are relative to the reference gene and calibrated toward the expression  
967 in the control line T89, for which the value is set to 1.

968 Error bars indicate SE obtained from three independent biological replicates.

969 (c) Average number of AR in stem cuttings of over-expressing *PtMYC2.1* transgenic T89  
970 compared to the wild type T89. For each line 15 cuttings were analysed. Data are means  $\pm$  SE,  
971  $n = 15$ .

972 (d-e) Average number of AR in stem cuttings of (c) OP42 and (d) T89 in the absence or presence  
973 of 5 $\mu$ M, 10 $\mu$ M and 20 $\mu$ M methyl jasmonate. For each line and each condition 15 cuttings were  
974 analysed. Data are means  $\pm$  SE,  $n = 15$ . Three independent biological replicates were used.

975 A two-way ANOVA with a Tukey's multiple comparisons test indicated that:

976 In the case of OP42 a significant difference between non treated plants and treated plants was  
977 observed at day 6 for all JA concentrations ( $P < 0.05$  for 5 and 10  $\mu$ M JA,  $P < 0.0001$  for 20  
978  $\mu$ M JA) and then at day 7 and 8 only in presence of 20  $\mu$ M JA ( $P < 0.01$ ). For T89 a very  
979 significant effect of JA was observed for all concentrations from day 5 until day 15 ( $P < 0.0001$   
980 for 10 and 20  $\mu$ M,  $P < 0.05$  from day 5 until day 12)

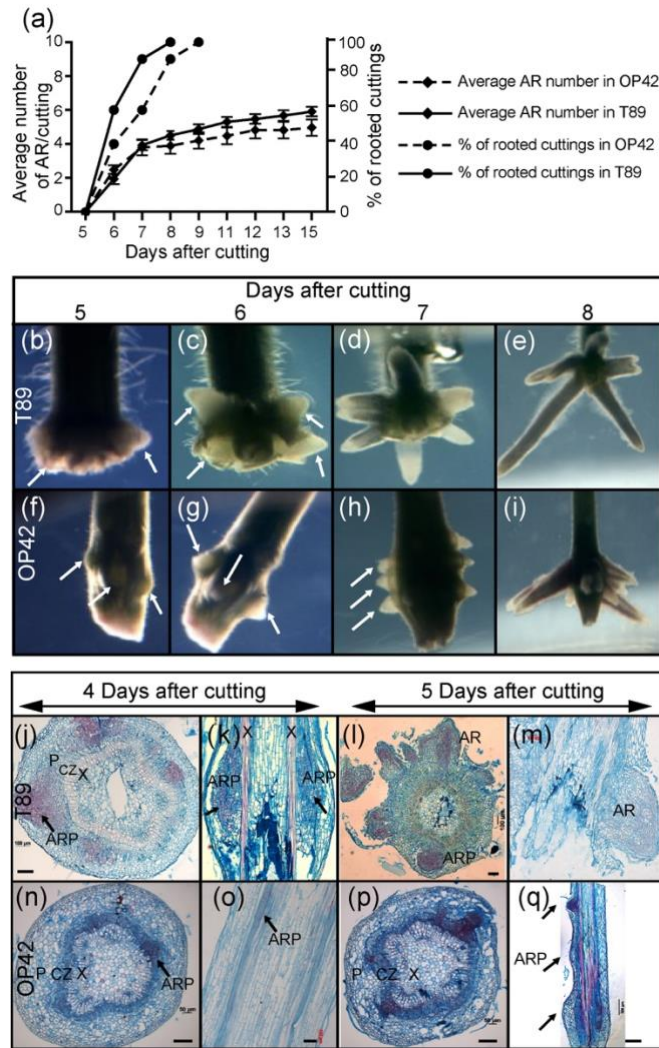

**Fig.1: Pattern of adventitious rooting in hybrid aspen and hybrid poplar *in vitro*.**

(a) Average number of adventitious roots (AR) and percentage of rooted cuttings in T89 and OP42. Fifteen 3-cm-long cuttings, starting from the shoot apex, were taken from 4-week-old plantlets, amplified *in vitro*, and transferred onto half-strength MS medium as shown in Figs S1a,b,d). The emerged AR were scored starting on day 5 after transfer on fresh medium, until day 15. Data from three independent biological replicates, each of 15 stem cuttings, were pooled and averaged. Error bars indicate standard error.

(b to e) In T89, AR developed all around the base of the cuttings in a crown-like formation as arrowed.

(f to i) In OP42, AR developed few mm above the base of the cuttings and along the stem as arrowed.

(j to q) Cross- (j, l, n, p) and longitudinal (k, m, o, q) sections show that in both cases the AR primordia develop from cells situated in the cambium/phloem region. CZ = cambial zone; P = Phloem; X = Xylem; APR = Adventitious root primordium; AR = Adventitious root.

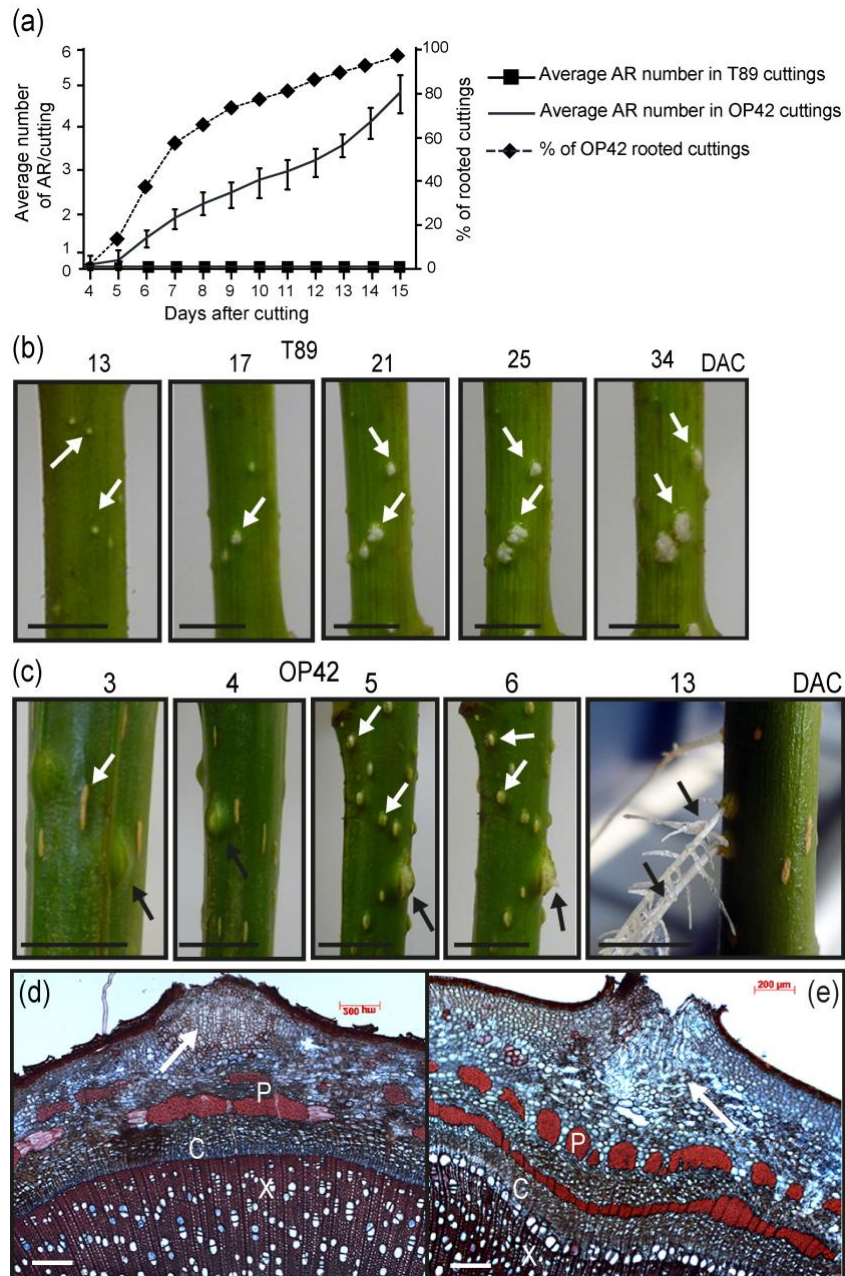

**Fig.2: Adventitious root development in woody stem cuttings under hydroponic conditions**

(a) Average number of adventitious roots (AR) and rooting percentage in T89 and OP42. About 20 cm lengths of stem from three-month-old greenhouse-grown hybrid aspen T89 and OP42 plants. The stem cuttings were kept in hydroponic conditions for five weeks and the number of AR was scored every day after cutting (DAC). Data from three biological replicates, each of at least 15 stem cuttings, were pooled and averaged. Error bars indicate standard error. (b) In T89 only lenticels were observed (white arrows).

(c) In OP42, bulges of AR primordia were observed three DAC, and fully developed into AR 13 DAC (black arrows). Lenticels were also observed in OP42 cuttings (white arrows).

(d, e) Cross-sections at the level of a lenticel (white arrows) in T89 (d) and OP42 (e). X = xylem; C = cambium; P = phloem.

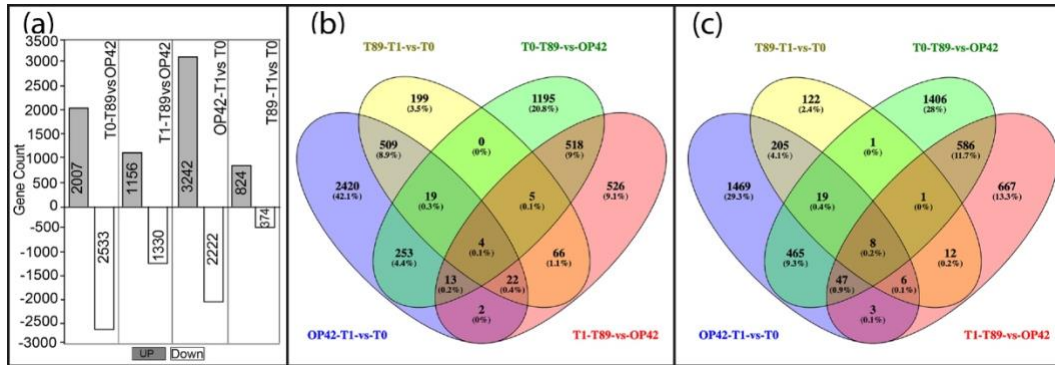

**Fig.3: Number of differentially expressed genes (DEGs) between T89 and OP42**

(a) Total number of differentially expressed genes up- and down-regulated in T89 and OP42. Venn diagram of DEGs between T89 and OP42

(b) Up-regulated (c) Down-regulated. Abbreviations signify as follows:

T1-T89-vs-OP42; genes are up- or down-regulated in T89 compared to OP42 at time T1. T0-T89-vs-OP42; genes are up- or down-regulated in T89 compared to OP42 at time T0. T89-T1-vs-T0; genes are up- or down-regulated at time T1 compared to time T0 in T89. OP42-T1-vs-T0; genes are up- or down-regulated at time T1 compared to time T0 in OP42.

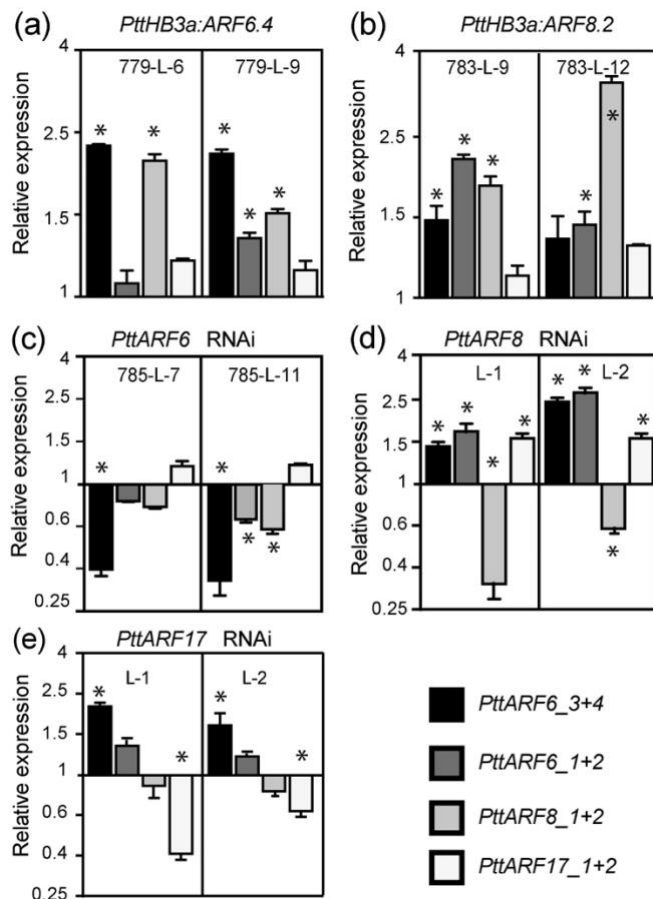

**Fig. 4: Relative un-cleaved transcript amount of *PtARF6.1/2*, *PtARF6.3/4*, *PtARF8.1/2*, *PtARF17.1/2* in transgenic lines overexpressing or downregulated for *PtARF6*, *PtARF8* or *PtARF17***

The *PtARF6.1/2*, *PtARF6.3/4*, *PtARF8.1/2*, *PtARF17.1/2* un-cleaved transcript abundance was quantified in stem cutting fragments of independent over-expressing (a, b) or down-regulated (c-e) lines.

Gene expression values are relative to the reference genes and calibrated toward the expression in the control line T89, for which the value is set to 1.

Error bars indicate SE obtained from three independent biological replicates. A one-way analysis of variance combined with the Dunnett's comparison post-test indicated that the values marked with an asterisk differed significantly from T89 values ( $P < 0.05$ ;  $n = 3$ ).

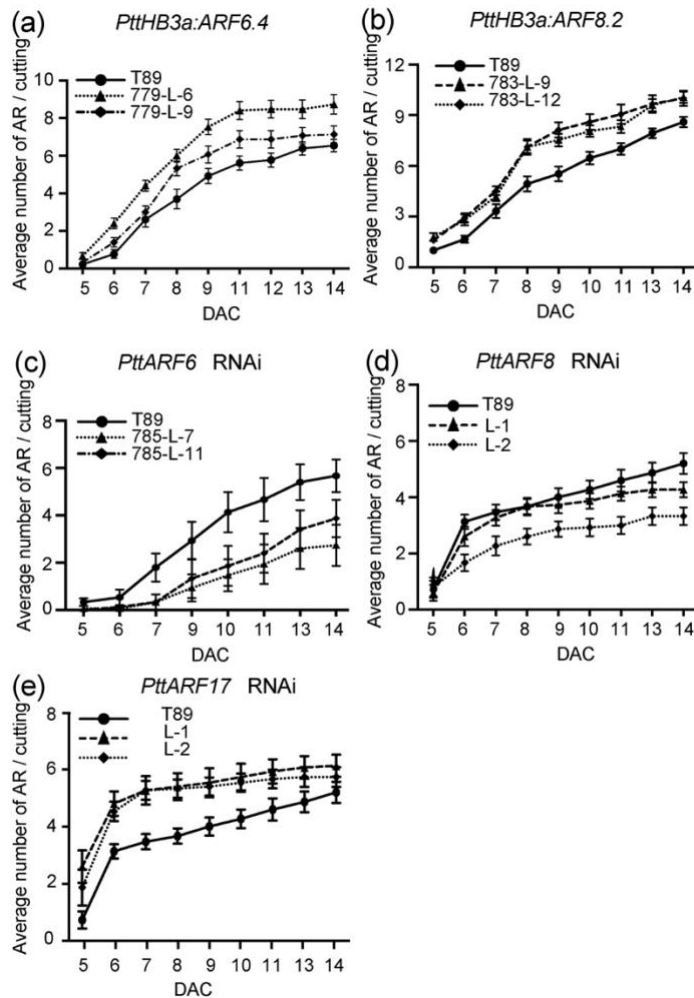

**Fig. 5: *PtARF6* and *PtARF8* positively control adventitious root (AR) development while *PtARF17* is a negative regulator.**

(a, b) Average number of AR on cuttings of transgenic plants expressing *PtARF6.4* (a) and *PtARF8.2* (b) under the cambium specific promoter *pPtHB3*. Rooting assay was performed as described in Material and Methods. Two independent transgenic lines were compared to the control T89. AR number was scored every day starting day 5 after cutting until 14 days after cut (DAC). For each line 15 cuttings were analysed.

(c-e) Average number of AR on cuttings of transgenic plants expressing the *p35S:PtARF6.2-RNAi* (c), *p35S:PtARF8.4-RNAi* (d) or *p35S:PtARF17.2-RNAi* (e) constructs. Two independent transgenic lines were compared to the T89 control. AR number was scored every day starting day 5 after cutting until 14 DAC. For each line 15 cuttings were analysed.

Data are means  $\pm$  SE,  $n = 15$ , corresponding to two independent lines per construct. A two-way ANOVA with a Tukey's multiple comparisons test indicated that the difference between the transgenic lines and the control were significant, except for *PtHB3a:ARF6.4* line 779-L-9 for which the difference was significant only from day 8 to 12, and *PtARF8-RNAi* L-1 for which no significant difference was observed.

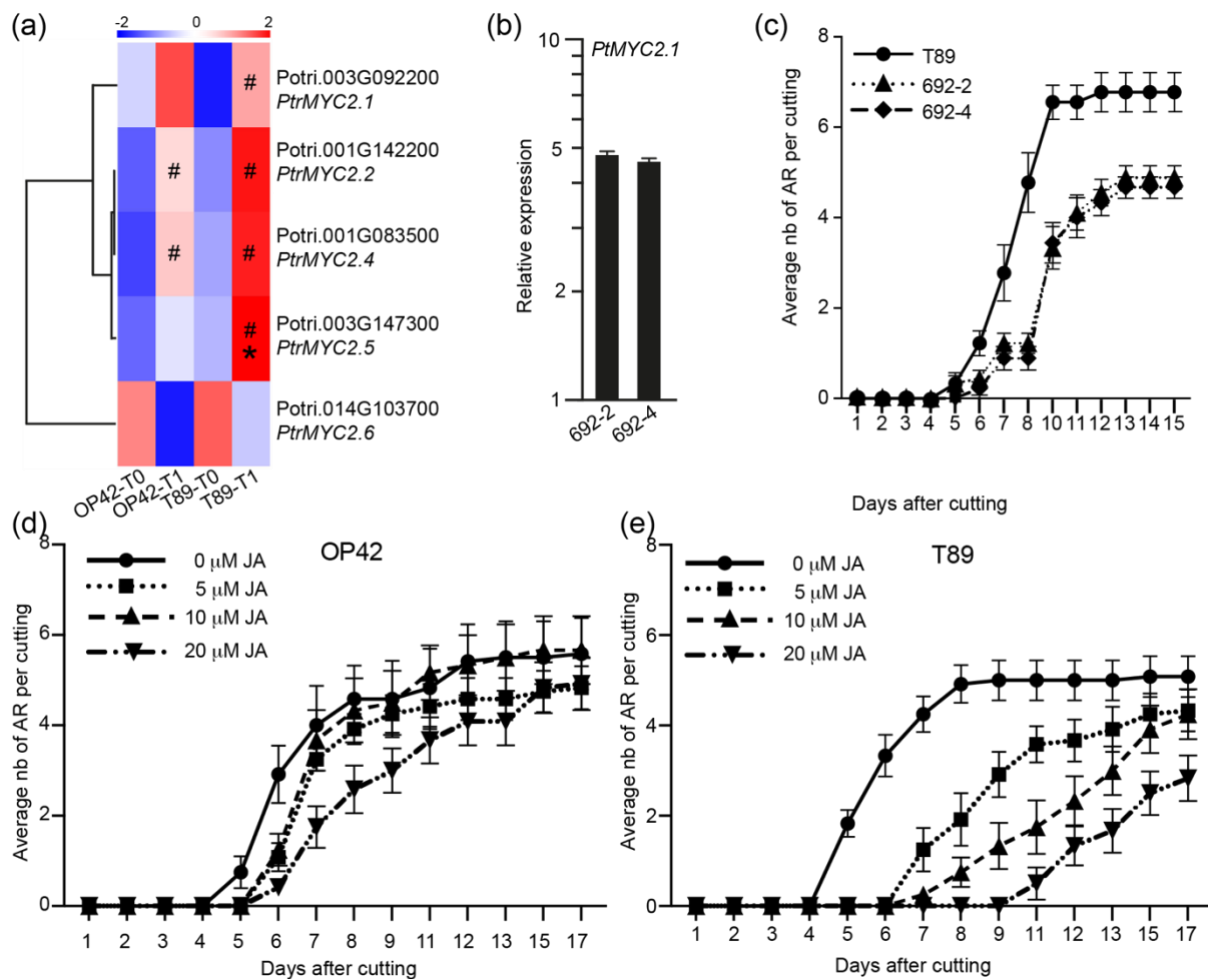

**Fig. 6: Jasmonate is a negative regulator of AR development in hybrid aspen cuttings**

(a) The expression of five out of six *PtMYC2* paralogues found in the transcriptomic data set presented as a heat map clustering in T89 and OP42 at time T0 and T1. Colours indicate low expressed genes (blue) or highly expressed genes (red)

(b) *PtMYC2.1* transcript abundance was quantified in stem cutting fragments of two independent transgenic T89 lines over-expressing *PtMYC2.1* under the 35S promoter (lines 692-2 and 692-3).

Gene expression values are relative to the reference gene and calibrated toward the expression in the control line T89, for which the value is set to 1.

Error bars indicate SE obtained from three independent biological replicates.

(c) Average number of AR in stem cuttings of over-expressing *PtMYC2.1* transgenic T89 compared to the wild type T89. For each line 15 cuttings were analysed. Data are means  $\pm$  SE, n = 15.

(d-e) Average number of AR in stem cuttings of (c) OP42 and (d) T89 in the absence or presence of 5 $\mu$ M, 10 $\mu$ M and 20 $\mu$ M methyl jasmonate. For each line and each condition 15 cuttings were analysed. Data are means  $\pm$  SE, n = 15. Three independent biological replicates were used.

A two-way ANOVA with a Tukey's multiple comparisons test indicated that:

In the case of OP42 a significant difference between non treated plants and treated plants was observed at day 6 for all JA concentrations ( $P < 0.05$  for 5 and 10  $\mu$ M JA,  $P < 0.0001$  for 20  $\mu$ M JA) and then at day 7 and 8 only in presence of 20  $\mu$ M JA ( $P < 0.01$ ). For T89 a very



significant effect of JA was observed for all concentrations from day 5 until day 15 ( $P < 0.0001$  for 10 and 20  $\mu\text{M}$ ,  $P < 0.05$  from day 5 until day 12)
